# Supplementary material
Source: publisher figshare collection journal article supplement (https://sage.figshare.com/ndownloader/files/20179160)
Supplement: Supplementary file 1 [file 20179160]

## Sheet: BDE47_OverallFtest_020719
probeid	FC_BDE.1	FDR_BDE.1	FC_BDE15	FDR_BDE15	FC_BDE50	FDR_BDE50
1367452_at	1.01989	0.922169	1.00148	0.99613	-1.04553	0.785676
1367453_at	-1.00947	0.965758	-1.02283	0.906801	-1.02023	0.918739
1367454_at	1.02553	0.89037	1.0017	0.995385	1.03109	0.859895
1367455_at	-1.01336	0.93247	1.08171	0.412583	1.1552	0.0874659
1367456_at	1.01726	0.932763	1.02167	0.911292	-1.03752	0.826691
1367457_at	1.04085	0.682074	-1.05177	0.580604	-1.02262	0.85097
1367458_at	1.00413	0.989524	-1.01719	0.944831	-1.0365	0.866375
1367459_at	1.007	0.956385	-1.01033	0.933363	-1.01499	0.896344
1367460_at	1.00242	0.992595	-1.00577	0.979737	1.07077	0.598775
1367461_at	-1.00023	0.999416	1.01031	0.964585	1.06764	0.663064
1367462_at	-1.06377	0.809058	-1.11379	0.611868	-1.04948	0.86149
1367463_at	1.03312	0.890833	1.05048	0.816439	1.10432	0.555621
1367464_at	-1.00376	0.987699	1.01071	0.957721	-1.00394	0.987019
1367465_at	-1.03416	0.874155	-1.11555	0.455584	-1.07448	0.660962
1367466_at	-1.04048	0.848839	-1.05934	0.753053	-1.10111	0.536657
1367467_at	-1.00542	0.982963	1.01716	0.936009	1.10591	0.438963
1367468_at	-1.12553	0.606565	1.01552	0.966811	-1.10067	0.695266
1367469_at	-1.01468	0.937397	-1.07506	0.546294	-1.07221	0.563647
1367470_at	1.03866	0.832567	-1.01998	0.924826	1.05682	0.726492
1367471_at	-1.06957	0.791101	-1.05814	0.83251	-1.04296	0.885047
1367472_at	-1.08425	0.659371	-1.08631	0.650224	-1.01179	0.967111
1367473_at	-1.0567	0.834251	-1.03195	0.917055	-1.07895	0.747576
1367474_at	1.03197	0.874925	1.04269	0.819163	1.05873	0.725828
1367475_at	-1.03359	0.903159	1.05738	0.8117	1.03836	0.885508
1367476_at	1.04244	0.77041	1.09899	0.399616	1.16629	0.128832
1367477_at	1.11249	0.581933	1.10592	0.6081	1.13303	0.500031
1367478_at	1.00349	0.987813	-1.00076	0.997924	-1.00396	0.986331
1367479_at	-1.03686	0.839632	1.02867	0.882889	1.02073	0.919693
1367480_at	1.04377	0.752065	1.04966	0.709427	1.07933	0.501095
1367481_at	-1.03897	0.831813	-1.02039	0.923134	1.02172	0.917231
1367482_at	-1.05072	0.822775	-1.0244	0.926656	-1.113	0.53246
1367483_at	-1.02057	0.833679	-1.00781	0.947825	-1.09174	0.174276
1367484_at	-1.0986	0.47108	-1.03374	0.854349	-1.04692	0.777911
1367485_at	1.0158	0.95392	-1.0209	0.937093	-1.04041	0.862429
1367486_at	1.03955	0.868538	1.02896	0.908709	1.08564	0.652181
1367487_at	1.04295	0.803809	1.05571	0.724942	-1.025	0.89961
1367488_at	-1.00123	0.996504	-1.01724	0.925579	-1.01568	0.933726
1367489_at	1.03441	0.912462	1.04421	0.882889	-1.06449	0.811964
1367490_at	1.02438	0.910506	1.03722	0.851865	1.06436	0.701414
1367491_at	-1.02533	0.937096	-1.02328	0.942645	-1.0457	0.874592
1367492_at	-1.01219	0.959183	1.01156	0.961949	1.02641	0.90312
1367493_at	1.01254	0.947748	-1.00025	0.999416	-1.00961	0.960962
1367494_at	-1.03206	0.783903	-1.02037	0.879022	-1.00454	0.978279
1367495_at	-1.0995	0.591505	1.04907	0.828489	-1.03298	0.895051
1367496_at	-1.03056	0.82312	-1.04067	0.743256	-1.00658	0.971031
1367497_at	-1.06256	0.731678	-1.06415	0.723268	-1.01499	0.952184
1367498_at	-1.01175	0.953804	-1.061	0.660356	-1.06867	0.607905
1367499_at	-1.05616	0.826028	-1.08502	0.706089	-1.16267	0.409925
1367500_at	-1.06705	0.67469	-1.07308	0.638523	-1.07055	0.653216
1367501_at	1.02017	0.940141	1.01311	0.962654	1.09116	0.624481
1367502_at	-1.02542	0.863843	1.00915	0.957795	1.05303	0.652598
1367503_at	1.02835	0.887371	-1.03311	0.864168	-1.01069	0.962752
1367504_at	1.01249	0.963723	-1.04731	0.828637	1.01867	0.942968
1367505_at	1.00794	0.977493	-1.02176	0.930913	-1.01893	0.940544
1367506_at	1.01146	0.956385	1.00088	0.997901	1.10853	0.397121
1367507_at	-1.05305	0.720573	-1.01438	0.942874	1.04436	0.777083
1367508_at	-1.00545	0.987415	-1.00165	0.996784	1.10652	0.573887
1367509_at	1.01188	0.928019	-1.00905	0.947367	-1.01884	0.875865
1367510_at	-1.04844	0.829194	1.03514	0.885788	1.09617	0.600992
1367511_at	-1.02005	0.919128	-1.0465	0.772548	-1.01327	0.949411
1367512_at	-1.0246	0.876887	1.00307	0.989044	-1.00121	0.996155
1367513_at	-1.04806	0.85182	-1.01056	0.97431	-1.08131	0.710789
1367514_at	1.01767	0.948308	1.15849	0.349575	1.2071	0.209347
1367515_at	-1.07651	0.842714	-1.08477	0.822197	-1.09767	0.78626
1367516_at	1.03831	0.863095	1.08859	0.608894	1.11563	0.479629
1367517_at	-1.10494	0.611994	-1.09228	0.666423	-1.07607	0.734358
1367518_at	1.06908	0.716466	1.06969	0.713625	1.06953	0.713601
1367519_at	1.0818	0.587746	1.03478	0.857404	1.01638	0.941254
1367520_at	1.14027	0.471065	1.21667	0.242102	1.17438	0.356294
1367521_at	-1.11257	0.658891	-1.07628	0.788524	-1.01051	0.978981
1367522_at	-1.04973	0.66762	-1.02293	0.87667	1.06484	0.54955
1367523_at	-1.03418	0.870776	1.05997	0.732798	1.0141	0.953298
1367524_at	1.08292	0.594954	1.05139	0.773899	1.03999	0.834944
1367525_at	1.02452	0.905449	-1.01596	0.942359	-1.04002	0.826201
1367526_at	1.02681	0.836342	1.0092	0.953994	1.03055	0.807013
1367527_at	-1.04729	0.883251	-1.05342	0.865016	1.04192	0.899127
1367528_at	1.05229	0.745231	1.06527	0.66553	1.09325	0.500071
1367529_at	-1.05641	0.695044	-1.07319	0.585993	-1.03534	0.831317
1367530_at	1.01097	0.964711	1.04135	0.833925	1.07986	0.621465
1367531_at	1.00918	0.971711	-1.00667	0.980049	-1.0302	0.886891
1367532_at	-1.06068	0.622838	-1.06795	0.571193	-1.05692	0.651093
1367533_at	-1.03213	0.915879	1.01101	0.975239	1.12682	0.558585
1367534_at	-1.00161	0.997901	-1.06254	0.838037	-1.03021	0.93255
1367535_at	1.03689	0.85918	1.00347	0.990972	-1.00406	0.989199
1367536_at	1.06328	0.702719	1.18051	0.185638	1.28425	0.0318895
1367537_at	-1.01602	0.936009	1.00374	0.987991	-1.06329	0.652719
1367538_at	1.02099	0.915515	-1.04115	0.807548	-1.03202	0.859714
1367539_at	-1.00474	0.990362	1.02989	0.919861	1.10017	0.648394
1367540_at	-1.03498	0.90397	-1.07831	0.736024	-1.06386	0.796594
1367541_at	1.00634	0.985745	-1.03595	0.89077	1.01696	0.953891
1367542_at	-1.06117	0.774636	1.02623	0.919825	-1.02184	0.935495
1367543_at	1.03272	0.923647	1.05227	0.868793	1.10223	0.693642
1367544_at	-1.07286	0.82367	-1.08268	0.793002	-1.13772	0.614895
1367545_at	1.03421	0.898011	1.03806	0.883488	-1.02389	0.932908
1367546_at	-1.03753	0.789681	1.04042	0.768474	1.01986	0.90505
1367547_at	1.06703	0.746653	-1.01739	0.950265	1.03501	0.887965
1367548_at	1.05367	0.825135	1.00413	0.991181	-1.03019	0.912522
1367549_a_at	1.00947	0.963851	-1.04607	0.764351	-1.05253	0.72075
1367550_a_at	-1.0115	0.961949	1.07805	0.622838	1.0162	0.943964
1367551_a_at	-1.03057	0.882182	-1.06213	0.711504	1.0474	0.794977
1367552_at	-1.0428	0.82917	-1.00796	0.975968	-1.05875	0.743256
1367553_x_at	-1.00013	0.999634	-1.00203	0.996672	-1.02908	0.928975
1367554_at	1.00656	0.983293	1.03415	0.887902	-1.00337	0.992188
1367555_at	-1.00713	0.898806	-1.00347	0.955521	1.00043	0.99613
1367556_s_at	1.0003	0.997909	1.00022	0.998487	-1.00207	0.979911
1367557_s_at	-1.11186	0.794524	-1.24489	0.499452	-1.25371	0.479992
1367558_x_at	1.06104	0.716853	1.05409	0.757329	1.02019	0.927673
1367559_at	-1.06215	0.746299	-1.00643	0.982823	1.01173	0.964898
1367560_at	-1.02699	0.902601	-1.05212	0.777669	-1.08154	0.612524
1367561_at	-1.01592	0.907287	-1.00375	0.982552	-1.06025	0.524721
1367562_at	1.09617	0.75911	1.04905	0.89588	1.06429	0.854401
1367563_at	1.03773	0.961933	-1.26447	0.639015	1.02751	0.973148
1367564_at	1.01295	0.964461	1.07295	0.722906	1.04469	0.851035
1367565_a_at	-1.02941	0.777203	-1.02697	0.800994	-1.01717	0.886861
1367566_at	-1.06821	0.764632	-1.06469	0.780668	1.00335	0.993024
1367567_at	1.00933	0.971273	-1.0261	0.906584	-1.04081	0.836742
1367568_a_at	1.20763	0.810906	-1.0539	0.958541	1.04543	0.965901
1367569_at	-1.09267	0.636328	-1.06995	0.741504	-1.05503	0.808949
1367570_at	1.16641	0.791813	1.11601	0.865716	1.36646	0.502445
1367571_a_at	1.0124	0.956169	-1.05478	0.740686	-1.14069	0.299141
1367572_at	1.7614	0.618258	1.12022	0.947607	-1.04305	0.983293
1367573_at	1.01966	0.885227	-1.01518	0.915301	1.0035	0.984576
1367574_at	1.00353	0.994999	-1.14337	0.601017	-1.03419	0.928997
1367575_at	-1.14979	0.714448	-1.29062	0.430562	-1.38641	0.28761
1367576_at	1.08954	0.651446	1.06898	0.745231	1.09745	0.612554
1367577_at	1.54154	0.732017	1.2081	0.907009	1.19675	0.911933
1367578_at	1.00698	0.995346	-1.14562	0.842571	-1.15687	0.827244
1367579_a_at	-1.00875	0.983305	-1.0636	0.831591	-1.01001	0.980133
1367580_at	-1.04448	0.836761	-1.01325	0.960552	-1.05337	0.794911
1367581_a_at	1.13236	0.701414	-1.01632	0.974382	1.02054	0.966414
1367582_at	-1.03795	0.828664	-1.03465	0.848287	-1.09646	0.475691
1367583_at	-1.0054	0.945218	-1.0066	0.931938	-1.02558	0.628577
1367584_at	1.07684	0.83464	-1.05779	0.883528	-1.00249	0.996826
1367585_a_at	-1.08848	0.657269	-1.13588	0.455071	-1.09336	0.633112
1367586_at	-1.00612	0.989045	1.00393	0.993303	1.11529	0.645444
1367587_at	-1.02439	0.900578	1.04813	0.765916	-1.00958	0.965499
1367588_a_at	-1.05161	0.76586	-1.0422	0.820485	-1.05978	0.71787
1367589_at	1.00618	0.9903	1.03824	0.921125	1.05877	0.870903
1367590_at	1.00165	0.99613	1.01772	0.939423	1.07782	0.629982
1367591_at	-1.05498	0.851498	1.008	0.984266	1.09919	0.687578
1367592_at	1.02887	0.980246	1.10424	0.917436	1.06485	0.951357
1367593_at	1.00886	0.984193	1.03955	0.910506	-1.11908	0.657486
1367594_at	-1.01691	0.973449	-1.16358	0.622363	-1.07966	0.842536
1367595_s_at	-1.01535	0.963655	1.01581	0.962419	-1.06307	0.810504
1367596_at	-1.03764	0.747932	-1.0284	0.82491	-1.03469	0.772701
1367597_at	-1.00628	0.981665	-1.05394	0.76943	-1.02294	0.919128
1367598_at	-1.00536	0.96739	-1.00051	0.997901	-1.00932	0.939019
1367599_at	1.14369	0.761741	1.08464	0.87683	1.10589	0.835488
1367600_at	1.35247	0.82091	-1.12582	0.942359	-1.16548	0.921282
1367601_at	-1.11279	0.781245	-1.19709	0.578158	-1.23619	0.493659
1367602_at	-1.02917	0.943147	-1.07839	0.818342	-1.26695	0.313778
1367603_at	-1.16628	0.436294	-1.14063	0.522026	-1.04893	0.865062
1367604_at	-1.09186	0.85883	-1.2609	0.524273	-1.27175	0.502394
1367605_at	-1.03512	0.938095	-1.12648	0.709209	-1.18947	0.543154
1367606_at	-1.00721	0.973034	-1.01952	0.915879	-1.03605	0.822581
1367607_at	-1.04778	0.739376	-1.0351	0.825076	-1.0015	0.995687
1367608_at	1.01976	0.942924	1.02128	0.938573	-1.01628	0.954223
1367609_at	-1.12585	0.700646	-1.09359	0.792822	1.0766	0.837709
1367610_at	1.01347	0.914468	1.00494	0.972903	1.01071	0.934848
1367611_at	1.01182	0.974313	1.01656	0.962078	1.04983	0.865397
1367612_at	-1.01539	0.900151	1.01725	0.885103	1.07183	0.374965
1367613_at	-1.01105	0.939364	1.0881	0.316318	1.26533	0.0009997
1367614_at	1.07974	0.906651	-1.13808	0.82143	-1.33902	0.505405
1367615_at	-1.018	0.953325	1.1356	0.492036	1.03334	0.905842
1367616_at	1.06766	0.65772	1.11484	0.398485	-1.01556	0.942655
1367617_at	-1.07115	0.896869	-1.13542	0.773905	-1.17865	0.682847
1367618_a_at	-1.02052	0.919384	-1.01574	0.94104	-1.01364	0.949411
1367619_at	-1.1337	0.511964	1.04677	0.862937	1.22449	0.240103
1367620_at	-1.02226	0.886856	-1.02346	0.88012	1.02345	0.87993
1367621_at	1.07487	0.865169	1.01123	0.98511	1.09916	0.808579
1367622_at	-1.03707	0.860718	-1.01179	0.962625	1.01989	0.933592
1367623_at	-1.02277	0.941254	-1.02025	0.948671	-1.04112	0.882889
1367624_at	1.01493	0.971893	1.00139	0.998213	-1.00122	0.99836
1367625_at	1.01592	0.934307	1.01334	0.945892	-1.08023	0.530431
1367626_at	3.20729	0.555726	1.09873	0.978234	1.39051	0.908065
1367627_at	-1.00058	0.999416	-1.0911	0.741866	-1.09295	0.733389
1367628_at	1.0589	0.935862	-1.05483	0.940574	1.16205	0.787879
1367629_at	-1.01521	0.933148	-1.0103	0.956319	1.03137	0.838698
1367630_at	-1.01801	0.944587	-1.03296	0.888202	-1.09115	0.604092
1367631_at	1.01625	0.979955	1.09408	0.851035	1.0309	0.957724
1367632_at	-1.25666	0.0874659	-1.15748	0.315701	-1.21225	0.162892
1367633_at	1.05408	0.928112	-1.06236	0.914991	-1.11697	0.820894
1367634_at	1.003	0.985832	-1.02094	0.857846	-1.03395	0.733389
1367635_at	-1.019	0.910367	-1.01705	0.921119	1.00061	0.998267
1367636_at	-1.01407	0.962877	-1.05099	0.834944	-1.05913	0.800789
1367637_a_at	-1.06135	0.721153	-1.12183	0.408392	-1.10493	0.484073
1367638_at	-1.04039	0.893387	1.11387	0.616891	1.06363	0.811964
1367639_a_at	-1.08664	0.651103	-1.05134	0.818639	-1.11108	0.53765
1367640_at	-1.01359	0.948308	-1.04974	0.751353	-1.0408	0.806882
1367641_at	1.01058	0.943597	1.077	0.408392	1.18387	0.0247277
1367642_at	1.00531	0.984624	1.02507	0.906943	1.08292	0.591893
1367643_at	-1.10636	0.587581	-1.03608	0.890845	1.0063	0.985898
1367644_at	-1.06353	0.675345	-1.12215	0.355809	-1.14282	0.27097
1367645_at	-1.03064	0.888579	-1.01566	0.948784	-1.08888	0.58305
1367646_at	1.01051	0.970086	-1.05924	0.764583	-1.04422	0.836621
1367647_at	1.01131	0.906134	-1.00999	0.918557	-1.02487	0.744433
1367648_at	1.02907	0.932674	1.03643	0.911327	-1.08515	0.747991
1367649_at	1.10796	0.696248	1.03913	0.91243	-1.01347	0.973778
1367650_at	1.00688	0.993056	-1.09627	0.858793	-1.17686	0.701314
1367651_at	-1.19004	0.371194	-1.12782	0.570597	-1.1569	0.470209
1367652_at	1.12425	0.808618	-1.1698	0.719774	1.12961	0.798339
1367653_a_at	-1.03236	0.898584	-1.11439	0.528373	-1.02245	0.933606
1367654_at	-1.02412	0.927746	1.0727	0.719387	1.12261	0.491375
1367655_at	-1.23546	0.327695	-1.05081	0.880812	-1.20383	0.401202
1367656_at	-1.07173	0.719774	1.11091	0.536657	1.16512	0.327695
1367657_at	-1.10546	0.620138	-1.21765	0.255376	-1.25555	0.173972
1367658_at	1.10684	0.74253	1.06094	0.873426	1.02757	0.948873
1367659_s_at	-1.03841	0.922811	1.21212	0.437741	1.4701	0.0768582
1367660_at	1.60784	0.729566	1.1205	0.953217	-1.16048	0.936548
1367661_at	-1.03975	0.954705	-1.08724	0.890782	1.01865	0.980765
1367662_at	1.0932	0.598742	1.10893	0.526115	1.06726	0.727016
1367663_at	-1.04911	0.778041	-1.04018	0.828383	1.01983	0.926795
1367664_at	1.17448	0.5899	1.0626	0.881566	1.12501	0.719556
1367665_at	1.05841	0.731164	1.04652	0.799705	1.07833	0.616671
1367666_at	-1.01009	0.965998	-1.00099	0.997901	-1.02464	0.90656
1367667_at	1.2094	0.693046	1.21994	0.675498	1.38965	0.428281
1367668_a_at	-1.16627	0.497846	-1.27966	0.228382	-1.27197	0.241947
1367669_a_at	-1.16269	0.433901	-1.0701	0.781785	-1.12963	0.546436
1367670_at	1.03032	0.893387	1.01366	0.956473	1.18754	0.210065
1367671_at	1.04985	0.907812	-1.06736	0.869332	1.01341	0.979082
1367672_at	1.01274	0.970228	1.07625	0.7493	1.15386	0.447894
1367673_at	-1.17471	0.512151	-1.05904	0.866278	1.01189	0.978573
1367674_at	1.06046	0.63511	1.06161	0.626457	1.07634	0.526821
1367675_at	-1.02284	0.933991	-1.036	0.886775	-1.0359	0.886801
1367676_at	-1.02407	0.972851	-1.12626	0.816995	-1.14719	0.77778
1367677_at	-1.05664	0.757667	1.062	0.727858	1.11919	0.436294
1367678_at	-1.01629	0.927138	1.00723	0.971202	1.08512	0.465376
1367679_at	-1.40356	0.651234	-1.19806	0.844756	-1.61976	0.475152
1367680_at	-1.11024	0.69361	1.00395	0.993671	1.14096	0.592291
1367681_at	1.00053	0.998946	-1.04009	0.83305	1.01114	0.962419
1367682_at	1.09464	0.768561	1.18852	0.493608	1.14936	0.600725
1367683_at	-1.06846	0.791485	-1.11104	0.622217	1.01294	0.970799
1367684_at	1.05782	0.781229	1.1228	0.473065	1.02854	0.907896
1367685_at	-1.07643	0.658691	-1.04512	0.823935	-1.07585	0.660356
1367686_at	-1.02227	0.90656	-1.01966	0.918583	1.05365	0.716184
1367687_a_at	1.19277	0.313578	1.05669	0.822581	1.02931	0.919132
1367688_at	-1.02327	0.905029	1.04181	0.803235	1.08514	0.533512
1367689_a_at	-1.28179	0.741789	-1.27204	0.752065	-1.57662	0.468583
1367690_at	-1.15563	0.436473	-1.13613	0.504083	-1.19722	0.309267
1367691_at	1.07323	0.908065	1.01782	0.981237	1.13765	0.804838
1367692_at	1.06953	0.651713	1.1134	0.414721	1.06639	0.668106
1367693_at	1.01794	0.964363	-1.08807	0.769362	-1.03703	0.919132
1367694_at	1.03711	0.886155	1.0458	0.8528	1.08952	0.658708
1367695_at	1.03778	0.889437	1.01205	0.970429	1.09171	0.665367
1367696_at	-1.11306	0.723991	1.1866	0.51796	1.07039	0.847547
1367697_at	-1.04379	0.862101	-1.10991	0.570597	-1.10957	0.570813
1367698_a_at	-1.05643	0.720968	-1.06154	0.689225	-1.06516	0.666263
1367699_at	1.00868	0.980133	1.02191	0.943147	1.08569	0.703272
1367700_at	1.11291	0.879309	-1.29539	0.624076	1.05251	0.948914
1367701_at	1.04158	0.903159	1.03445	0.921022	-1.0204	0.956169
1367702_at	-1.00477	0.991181	1.0023	0.996146	1.12066	0.599352
1367703_at	1.03481	0.87402	1.07374	0.673855	1.10914	0.493709
1367704_at	1.06282	0.849913	-1.09591	0.743577	1.05692	0.866636
1367705_at	-1.21387	0.500036	-1.04576	0.918563	-1.08855	0.820609
1367706_at	-1.03345	0.898256	-1.01483	0.959144	1.05448	0.812533
1367707_at	1.07105	0.922811	-1.17377	0.779099	1.03118	0.969696
1367708_a_at	1.0447	0.955801	-1.08685	0.907506	1.07572	0.920188
1367709_at	-1.08823	0.73608	-1.24178	0.271318	-1.37071	0.0835497
1367710_at	-1.06014	0.777083	-1.01358	0.961822	1.07465	0.706131
1367711_at	-1.01432	0.937796	1.09807	0.394552	1.17256	0.105894
1367712_at	-1.0077	0.995257	-1.20466	0.78372	1.07396	0.933994
1367713_at	-1.08267	0.627806	-1.0549	0.775967	1.01463	0.953721
1367714_at	1.06102	0.828865	1.16169	0.466062	1.17703	0.420415
1367715_at	-1.09042	0.736875	-1.05796	0.85097	-1.03034	0.930966
1367716_at	1.05806	0.80088	1.04501	0.855017	1.18084	0.3111
1367717_at	-1.03568	0.848758	1.02646	0.895145	-1.0718	0.633681
1367718_at	-1.05561	0.813721	1.03595	0.891584	1.02664	0.923068
1367719_at	1.04306	0.824731	-1.05134	0.781204	1.00186	0.995637
1367720_at	1.1395	0.5117	1.12562	0.563616	1.11942	0.585524
1367721_at	1.03709	0.901735	1.05867	0.827031	-1.02163	0.946833
1367722_at	1.02723	0.906599	1.02328	0.921282	-1.05258	0.787987
1367723_a_at	-1.01086	0.968112	-1.0263	0.912222	-1.13176	0.413309
1367724_a_at	-1.02381	0.896545	-1.00777	0.971654	-1.03987	0.802013
1367725_at	-1.16015	0.567205	-1.08957	0.782531	-1.09284	0.77115
1367726_at	1.04144	0.872399	-1.03361	0.900565	-1.06982	0.751339
1367727_at	1.0165	0.936683	-1.03843	0.824175	-1.09141	0.499452
1367728_at	-1.03445	0.954339	-1.04685	0.936009	-1.06379	0.908021
1367729_at	-1.36409	0.33994	-1.76237	0.0508221	-1.57324	0.130385
1367730_at	1.03621	0.881302	-1.03434	0.888128	1.05307	0.807032
1367731_at	-1.04768	0.881477	-1.08959	0.736645	-1.0504	0.873241
1367732_at	-1.03768	0.864168	-1.01378	0.956777	-1.01328	0.958634
1367733_at	-1.03918	0.973731	-1.05646	0.960378	-1.0846	0.938627
1367734_at	1.04277	0.888893	-1.00484	0.991069	-1.12454	0.587108
1367735_at	1.02381	0.93283	1.01661	0.95456	1.11274	0.55724
1367736_at	1.00345	0.992324	-1.00784	0.980133	1.00234	0.995346
1367737_at	-1.00038	0.999416	-1.1037	0.494872	-1.14181	0.327654
1367738_at	1.01296	0.976665	-1.09171	0.771266	-1.18945	0.477125
1367739_at	3.72856	0.549899	1.42599	0.912088	1.56435	0.883709
1367740_at	-1.01733	0.965738	-1.00626	0.989623	-1.07985	0.794777
1367741_at	1.1396	0.691062	1.03162	0.947385	1.07259	0.862429
1367742_at	-1.09996	0.890535	1.21487	0.724942	1.0344	0.966553
1367743_at	-1.14979	0.567205	-1.16999	0.506871	-1.0352	0.923434
1367744_at	1.21562	0.462316	1.10168	0.767567	1.08496	0.814492
1367745_at	-1.00229	0.995964	-1.01351	0.967872	-1.00443	0.991181
1367746_a_at	-1.09394	0.625697	-1.09797	0.606607	-1.07235	0.725498
1367747_at	-1.04381	0.872958	-1.16289	0.409348	-1.12494	0.543106
1367748_at	-1.03957	0.93352	-1.09918	0.799705	-1.09109	0.819971
1367749_at	2.35539	0.18246	1.66515	0.477544	2.42432	0.167244
1367750_at	-1.14916	0.428415	-1.16601	0.367788	-1.12363	0.522527
1367751_at	1.01833	0.939834	1.024	0.917436	1.02111	0.928975
1367752_at	1.09529	0.711809	1.08105	0.764315	1.13678	0.562922
1367753_at	-1.03289	0.921332	1.00822	0.984266	1.10975	0.659828
1367754_s_at	-1.12137	0.708434	-1.35463	0.207525	-1.46035	0.0994853
1367755_at	-1.02401	0.936317	-1.13169	0.511032	-1.16745	0.386219
1367756_at	1.0008	0.998702	-1.06899	0.766249	1.08341	0.702747
1367757_at	1.0004	0.998923	1.00178	0.993535	1.04887	0.679602
1367758_at	1.00395	0.972182	1.01109	0.908134	1.01909	0.820715
1367759_at	-1.07519	0.832309	-1.09184	0.785754	-1.09326	0.781204
1367760_at	1.07387	0.706166	1.07257	0.712598	1.03628	0.880263
1367761_at	1.04545	0.8039	-1.0207	0.924371	-1.02251	0.9164
1367762_at	1.11239	0.347285	1.19674	0.0808696	1.02256	0.899961
1367763_at	1.04935	0.835488	1.00284	0.993947	1.03937	0.877226
1367764_at	1.04574	0.93477	-1.11255	0.809736	-1.15864	0.708833
1367765_at	1.07552	0.700646	-1.02694	0.916188	-1.13486	0.436294
1367766_at	-1.20111	0.354612	-1.09149	0.717005	-1.06249	0.824559
1367767_at	-1.08416	0.646942	1.01661	0.950265	1.07192	0.706333
1367768_at	1.06689	0.845972	1.06391	0.854349	-1.04348	0.907859
1367769_at	-1.08981	0.604914	-1.07472	0.682074	-1.05787	0.768423
1367770_at	-1.04221	0.834465	-1.01453	0.953188	-1.03664	0.862101
1367771_at	1.05421	0.857846	1.0175	0.961619	1.01631	0.964106
1367772_at	-1.02022	0.909763	1.01335	0.944528	1.05102	0.714448
1367773_at	1.11129	0.779314	1.10846	0.786487	1.49085	0.13203
1367774_at	1.07063	0.779278	1.22681	0.257054	1.28319	0.149307
1367775_at	1.01798	0.942837	1.03957	0.85474	1.13999	0.374312
1367776_at	-1.08077	0.831813	-1.1263	0.707781	-1.01616	0.973731
1367777_at	-1.01615	0.960626	1.10608	0.62781	1.09598	0.668177
1367778_at	-1.19511	0.265888	-1.14281	0.433611	-1.12238	0.509315
1367779_at	1.16256	0.678224	1.0816	0.86248	-1.0213	0.970481
1367780_at	-1.02184	0.981665	-1.13706	0.852961	-1.04712	0.956052
1367781_at	1.09597	0.576358	1.06207	0.748191	1.07413	0.685275
1367782_at	3.24204	0.524273	1.05909	0.987281	1.42794	0.893233
1367783_at	-1.02094	0.881477	1.00423	0.981033	-1.017	0.90716
1367784_a_at	-1.07908	0.835627	-1.01375	0.978	-1.08266	0.826762
1367785_at	1.16665	0.766251	1.37278	0.449479	1.36625	0.457157
1367786_at	-1.37006	0.476724	-1.20782	0.713757	-1.48507	0.348292
1367787_at	-1.13429	0.567205	-1.16067	0.479991	-1.03619	0.91105
1367788_at	-1.0799	0.664853	-1.15854	0.328664	-1.13713	0.40663
1367789_at	1.01485	0.966261	1.01262	0.972213	-1.02382	0.942837
1367790_at	-1.03822	0.916956	-1.12756	0.640136	-1.094	0.75018
1367791_at	-1.09143	0.638735	-1.08515	0.667863	-1.14751	0.406905
1367792_at	1.16703	0.415726	1.19879	0.320935	1.15576	0.448942
1367793_at	1.0056	0.981115	1.11653	0.364591	1.29466	0.0119682
1367794_at	-1.02476	0.940207	-1.143	0.518095	-1.32555	0.109037
1367795_at	1.17481	0.586438	1.01909	0.969548	1.08824	0.817622
1367796_at	-1.00547	0.987169	1.03218	0.900094	-1.13246	0.456991
1367797_at	1.10367	0.675498	1.04437	0.886861	1.00889	0.982023
1367798_at	-1.04264	0.839492	-1.02602	0.911806	1.02091	0.932202
1367799_at	1.07682	0.838676	1.04247	0.920346	-1.0509	0.902601
1367800_at	1.02365	0.961034	-1.02434	0.959357	-1.01614	0.974647
1367801_at	-1.04516	0.822047	-1.12879	0.40093	-1.10657	0.499565
1367802_at	1.07587	0.853835	-1.12933	0.716184	-1.14635	0.670559
1367803_at	1.03146	0.885252	1.00972	0.970517	1.05866	0.746771
1367804_at	-1.01798	0.919132	1.08844	0.455083	1.09771	0.399616
1367805_at	1.13576	0.70207	-1.01818	0.972119	-1.16167	0.634559
1367806_at	-1.04949	0.886916	-1.12619	0.642745	-1.13274	0.619174
1367807_at	-1.08497	0.667797	-1.13391	0.457112	-1.16881	0.334075
1367808_at	-1.08668	0.704783	-1.03897	0.891398	-1.09118	0.685755
1367809_at	1.00227	0.995346	1.03049	0.9025	-1.01233	0.964711
1367810_at	1.07416	0.824288	1.09681	0.753865	1.0527	0.884278
1367811_at	1.11838	0.758735	1.03912	0.936386	1.07595	0.86149
1367812_at	-1.02519	0.933278	1.08791	0.691199	1.10038	0.637302
1367813_at	-1.11379	0.740783	-1.16206	0.606663	-1.18081	0.560106
1367814_at	-1.37486	0.366345	-1.36558	0.379634	-1.33107	0.430169
1367815_at	-1.03391	0.896411	1.07898	0.700947	1.1869	0.289038
1367816_at	-1.0104	0.992018	-1.02287	0.979912	-1.07597	0.922029
1367817_at	-1.10206	0.766396	-1.19072	0.524273	-1.13383	0.675345
1367818_at	-1.022	0.939593	1.02551	0.92857	1.15908	0.390314
1367819_at	1.05951	0.722123	-1.0033	0.990941	1.06367	0.696499
1367820_at	-1.11666	0.640473	1.03915	0.90656	1.00075	0.999107
1367821_a_at	1.04423	0.767273	1.04903	0.733658	1.02845	0.867725
1367822_at	1.05807	0.742195	1.06055	0.727858	1.09729	0.528552
1367823_at	1.11995	0.347285	1.12167	0.340205	1.10262	0.43229
1367824_at	1.04314	0.8253	-1.05729	0.748394	-1.02775	0.898809
1367825_at	1.11843	0.594047	-1.00512	0.990086	1.06345	0.809243
1367826_at	1.04756	0.841607	1.05272	0.820511	1.12213	0.506972
1367827_at	1.0883	0.572714	1.12391	0.399732	1.13552	0.351065
1367828_at	-1.04669	0.848077	1.03265	0.901922	1.12783	0.49053
1367829_at	-1.09653	0.485923	-1.10175	0.458772	1.01792	0.932567
1367830_a_at	1.0373	0.900472	1.03129	0.918563	-1.09811	0.667944
1367831_at	-1.05008	0.848462	-1.07967	0.7255	-1.11782	0.566369
1367832_at	-1.00311	0.992775	1.0034	0.992069	1.06278	0.75446
1367833_at	-1.08225	0.48228	1.08123	0.488426	1.20664	0.0456342
1367834_at	-1.0246	0.947376	-1.05912	0.8528	1.00476	0.992018
1367835_at	1.0134	0.971893	1.08907	0.732017	-1.01288	0.972827
1367836_at	-1.17582	0.69258	1.14529	0.755473	-1.01852	0.977279
1367837_at	-1.02974	0.808478	1.04822	0.647421	1.1716	0.0433641
1367838_at	1.07975	0.797552	1.1348	0.615975	1.15061	0.566255
1367839_at	1.13249	0.847389	1.29418	0.610664	1.48477	0.385928
1367840_at	-1.00936	0.970696	1.01876	0.935046	-1.04123	0.831375
1367841_a_at	1.02609	0.906801	1.07921	0.630437	-1.02617	0.90656
1367842_at	1.09105	0.72298	1.00053	0.999416	1.06336	0.824298
1367843_at	-1.03671	0.879309	1.17421	0.299141	1.44128	0.00573956
1367844_at	-1.09535	0.861364	-1.27656	0.522354	-1.17768	0.701147
1367845_at	-1.01457	0.962412	1.09387	0.655737	1.04877	0.847775
1367846_at	-1.00158	0.998584	1.01384	0.983493	-1.18694	0.653948
1367847_at	1.16257	0.783505	1.05311	0.941651	-1.31544	0.544176
1367848_at	1.12562	0.509315	1.08677	0.675505	1.23584	0.179708
1367849_at	1.12441	0.575983	1.0723	0.779278	1.06769	0.79617
1367850_at	-1.00179	0.997901	-1.01241	0.979867	-1.07124	0.848954
1367851_at	1.03295	0.90656	1.08179	0.70969	1.07254	0.7493
1367852_s_at	-1.05802	0.947454	-1.07483	0.930807	-1.24418	0.72041
1367853_at	1.07741	0.712239	1.02794	0.917903	1.05423	0.8167
1367854_at	1.01859	0.966414	-1.01809	0.967872	1.24713	0.365103
1367855_at	1.06895	0.900734	-1.03208	0.957469	-1.31559	0.436241
1367856_at	-1.13736	0.743618	-1.30879	0.398529	-1.45878	0.205737
1367857_at	1.08524	0.877874	1.08933	0.870776	1.47134	0.25477
1367858_at	1.09135	0.865827	-1.15771	0.736107	-1.4072	0.325255
1367859_at	1.26096	0.567639	1.2431	0.598775	1.1221	0.822002
1367860_a_at	-1.08023	0.914966	-1.35568	0.531448	1.04886	0.951339
1367861_at	-1.04116	0.882889	-1.04574	0.866973	-1.09461	0.667797
1367862_at	1.18859	0.340229	1.15613	0.440337	1.07553	0.750876
1367863_at	1.05169	0.701829	1.06733	0.592291	1.11888	0.296368
1367864_at	1.36539	0.682074	1.09282	0.934189	-1.08009	0.94345
1367865_at	-1.11398	0.591865	-1.13155	0.525119	-1.04352	0.875884
1367866_at	-1.10574	0.794911	-1.07015	0.87765	-1.02647	0.958634
1367867_at	-1.10279	0.727021	1.02534	0.948952	1.05911	0.863843
1367868_at	1.01336	0.964341	1.15951	0.377101	1.19605	0.268216
1367869_at	1.02233	0.940119	-1.05553	0.822775	-1.09828	0.637302
1367870_at	1.02842	0.894272	1.08839	0.570368	1.2048	0.136921
1367871_at	1.05222	0.853088	-1.05636	0.838109	-1.07303	0.775573
1367872_at	-1.06718	0.68551	-1.09873	0.514249	-1.03749	0.849856
1367873_at	-1.091	0.653027	-1.08189	0.69361	-1.00653	0.984931
1367874_at	1.1078	0.831742	-1.04845	0.934747	-1.11976	0.808579
1367875_at	-1.00505	0.976837	1.00429	0.980932	-1.07515	0.447894
1367876_at	-1.09705	0.730263	-1.14727	0.564708	-1.14347	0.574503
1367877_at	-1.08768	0.809329	-1.041	0.923231	1.06465	0.870191
1367878_at	-1.01472	0.930433	1.00907	0.958916	-1.0607	0.598868
1367879_at	-1.09737	0.580197	-1.11261	0.509201	-1.02155	0.932948
1367880_at	1.10033	0.75264	1.02795	0.946575	-1.03913	0.920899
1367881_at	-1.04323	0.922811	-1.18812	0.559626	-1.23879	0.441181
1367882_at	1.10025	0.498659	1.12586	0.376892	1.05964	0.722727
1367883_at	-1.04207	0.865827	-1.08037	0.695796	-1.0036	0.992175
1367884_at	-1.05244	0.915488	-1.11249	0.78839	1.07961	0.862276
1367885_at	1.11393	0.650222	1.13465	0.575916	1.13707	0.567205
1367886_at	1.02742	0.857203	1.0039	0.98582	-1.07631	0.501095
1367887_at	1.03047	0.896154	-1.01201	0.963742	-1.08056	0.650222
1367888_at	-1.015	0.965803	1.07413	0.77616	-1.05632	0.841153
1367889_at	1.11925	0.722906	-1.02577	0.95476	1.02625	0.953941
1367890_at	1.02283	0.929822	-1.05294	0.804838	-1.02577	0.918557
1367891_a_at	1.01543	0.979437	1.00032	0.999416	-1.24892	0.492764
1367892_at	1.02611	0.932157	1.02622	0.931921	1.11548	0.585549
1367893_a_at	-1.0521	0.824559	-1.11241	0.555621	-1.02601	0.923538
1367894_at	-1.11247	0.902971	-1.19162	0.817789	1.16979	0.841153
1367895_at	-1.04189	0.738052	-1.05902	0.603369	-1.04828	0.687554
1367896_at	2.33774	0.433901	1.12139	0.949346	1.17586	0.924263
1367897_at	-1.00559	0.983293	1.06896	0.66701	1.10416	0.473307
1367898_at	1.01133	0.988128	1.01138	0.988128	-1.03319	0.958541
1367899_at	-1.11667	0.698825	-1.1123	0.712598	-1.03651	0.926448
1367900_at	1.10388	0.799378	-1.05533	0.906599	-1.06058	0.896086
1367901_at	1.07667	0.625909	-1.05854	0.730064	-1.04481	0.808402
1367902_at	-1.13206	0.459485	-1.03433	0.892	-1.10965	0.554159
1367903_at	-1.05616	0.85097	1.13667	0.562553	1.08228	0.757329
1367904_at	1.14708	0.808239	1.17859	0.757091	1.28081	0.593138
1367905_at	-1.03043	0.953298	-1.07781	0.86258	1.06354	0.891398
1367906_at	1.0056	0.985303	1.0456	0.825233	1.09495	0.568318
1367907_a_at	-1.15937	0.51333	1.0664	0.827528	1.24857	0.286174
1367908_at	1.02095	0.933606	1.00785	0.977796	1.20346	0.184344
1367909_at	-1.04828	0.876618	1.01967	0.955625	1.08397	0.74988
1367910_at	-1.02995	0.936049	-1.03892	0.912708	-1.2216	0.361211
1367911_at	-1.04519	0.920986	-1.02842	0.953533	1.02429	0.960736
1367912_at	-1.0502	0.905196	-1.03793	0.931774	-1.05197	0.900734
1367913_at	-1.05094	0.827928	-1.06252	0.777083	-1.1011	0.598562
1367914_at	1.04489	0.852958	-1.03842	0.879309	-1.05696	0.800994
1367915_at	-1.03918	0.903158	1.07611	0.778308	1.15024	0.509139
1367916_at	1.13838	0.625697	-1.03265	0.934663	1.08309	0.798873
1367917_at	1.10453	0.526821	1.18513	0.223511	1.20713	0.167244
1367918_at	1.04618	0.874977	1.12746	0.565152	1.08059	0.745082
1367919_at	1.00928	0.983078	-1.07853	0.793128	-1.01769	0.963653
1367920_at	-1.05332	0.878753	-1.1007	0.729742	-1.13239	0.625715
1367921_at	-1.01144	0.962284	-1.01242	0.958321	1.01897	0.933914
1367922_at	-1.02624	0.906599	-1.04626	0.811794	-1.071	0.675461
1367923_at	1.03118	0.923134	1.05888	0.835488	1.05224	0.858546
1367924_at	-1.07281	0.716494	-1.02822	0.912259	-1.10679	0.55791
1367925_at	1.05679	0.826418	-1.03187	0.913318	-1.12886	0.534544
1367926_at	-1.05314	0.896859	1.07483	0.843389	1.17173	0.573157
1367927_at	1.01932	0.967111	1.16917	0.580972	1.37889	0.1806
1367928_at	1.21302	0.753798	1.13878	0.852931	1.00017	0.999858
1367929_at	-1.02316	0.971057	-1.09085	0.861244	-1.16295	0.713839
1367930_at	1.20814	0.564066	1.20588	0.567205	1.19913	0.581574
1367931_a_at	1.04666	0.923134	-1.03317	0.948155	-1.12423	0.749536
1367932_at	1.14176	0.826351	1.13091	0.842339	1.33367	0.539017
1367933_at	-1.13809	0.682074	-1.05054	0.907026	1.02089	0.965499
1367934_at	-1.09799	0.669091	-1.09807	0.66859	-1.05823	0.827048
1367935_at	-1.0554	0.700646	-1.10072	0.423968	1.01415	0.943099
1367936_at	1.01776	0.961041	-1.1075	0.667797	-1.10545	0.675343
1367937_at	1.11433	0.622623	1.21767	0.303279	1.26338	0.205584
1367938_at	-1.13637	0.616891	-1.03625	0.922711	1.06567	0.843218
1367939_at	1.03806	0.890734	-1.06717	0.778242	-1.10136	0.631125
1367940_at	1.07097	0.861124	-1.0052	0.993034	1.05243	0.903633
1367941_at	-1.02924	0.90656	1.08234	0.660562	1.13855	0.412073
1367942_at	-1.09241	0.867575	-1.18018	0.699689	-1.13498	0.788062
1367943_at	-1.03641	0.848954	-1.02071	0.922773	1.0141	0.950305
1367944_at	-1.02293	0.938627	-1.05913	0.807794	-1.09413	0.656688
1367945_at	-1.02406	0.907826	-1.0391	0.832408	-1.01298	0.954339
1367946_at	1.10589	0.737229	1.26994	0.316281	1.33487	0.209347
1367947_at	-1.08156	0.703078	-1.04954	0.84241	-1.05703	0.811151
1367948_a_at	1.02517	0.928975	1.00103	0.998213	-1.02751	0.920826
1367949_at	1.35354	0.451784	1.3236	0.49421	1.64052	0.170559
1367950_at	-1.31663	0.168911	-1.18837	0.436241	-1.15139	0.543386
1367951_at	1.69392	0.636611	1.2767	0.865062	1.04319	0.982643
1367952_at	-1.06643	0.802291	1.03035	0.923134	-1.02793	0.930785
1367953_at	1.02129	0.966744	1.05057	0.911794	1.02773	0.955017
1367954_at	-1.07173	0.774145	-1.11023	0.618446	-1.09402	0.682218
1367955_at	-1.0497	0.895331	-1.07275	0.832406	-1.0478	0.900074
1367956_at	1.04339	0.896154	-1.07597	0.791838	1.00324	0.994866
1367957_at	1.0354	0.875141	1.0366	0.869768	1.01025	0.970091
1367958_at	-1.12962	0.541424	-1.20175	0.31152	-1.14002	0.501461
1367959_a_at	1.01075	0.969215	-1.06529	0.733138	-1.26634	0.0808696
1367960_at	-1.07701	0.914468	-1.02187	0.97921	-1.09364	0.893387
1367961_at	1.17277	0.445835	1.16662	0.465111	1.13578	0.564413
1367962_at	1.18837	0.58622	1.10193	0.80029	1.16948	0.629982
1367963_at	1.10287	0.465111	1.01836	0.93247	1.08117	0.580972
1367964_at	2.93971	0.566255	1.26366	0.935046	1.40351	0.899129
1367965_at	-1.04666	0.766668	-1.01284	0.950803	-1.12155	0.334922
1367966_at	1.03886	0.84253	-1.03034	0.884278	-1.06881	0.675126
1367967_at	-1.02808	0.932736	1.10084	0.677867	1.14103	0.531066
1367968_at	1.03338	0.874593	1.07738	0.63739	1.03304	0.875969
1367969_at	-1.05411	0.731039	-1.04563	0.784305	-1.02878	0.879749
1367970_at	1.12297	0.831695	-1.04475	0.948094	-1.03117	0.964877
1367971_at	-1.04224	0.919132	-1.13524	0.669133	-1.0726	0.846368
1367972_at	-1.02752	0.88222	-1.01681	0.934317	1.09629	0.465926
1367973_at	1.35076	0.724414	1.02815	0.984419	-1.117	0.921104
1367974_at	-1.0977	0.804841	-1.18868	0.573727	-1.33663	0.290872
1367975_at	-1.17086	0.707105	-1.39125	0.340205	-1.37572	0.358601
1367976_at	1.01742	0.949411	-1.02909	0.908819	1.05789	0.787688
1367977_at	-1.0554	0.958333	-1.14545	0.880032	-1.29866	0.717832
1367978_at	1.04173	0.927078	1.10847	0.768423	-1.00564	0.992512
1367979_s_at	1.09385	0.903158	1.04877	0.953217	1.4174	0.473266
1367980_at	1.05904	0.829155	1.02759	0.93202	1.05759	0.83364
1367981_at	1.05638	0.79377	-1.0012	0.997901	1.03339	0.892801
1367982_at	1.16072	0.647007	1.77746	0.0207549	2.87528	0.000347118
1367983_at	1.01595	0.962802	-1.13744	0.534588	1.05191	0.855116
1367984_at	-1.187	0.594363	-1.06321	0.890301	-1.09731	0.813143
1367985_at	-1.01507	0.991203	-1.14869	0.883449	-1.25672	0.778287
1367986_at	1.09216	0.760955	-1.00382	0.994179	1.03843	0.917367
1367987_at	-1.0148	0.954502	-1.01945	0.938627	-1.00959	0.972339
1367988_at	1.10125	0.620138	1.00649	0.985891	1.01922	0.94868
1367989_at	1.24441	0.798899	1.16566	0.873439	-1.19027	0.849913
1367990_at	1.05435	0.806112	1.05358	0.809736	1.0776	0.694958
1367991_at	-1.01988	0.937795	-1.06458	0.73608	-1.12135	0.462316
1367992_at	1.05311	0.845582	1.04422	0.878109	-1.03495	0.906709
1367993_at	-1.04553	0.881734	1.05587	0.847817	1.19419	0.369162
1367994_at	-1.01569	0.979787	-1.11072	0.806177	-1.01888	0.974835
1367995_at	-1.01418	0.952805	1.00197	0.995346	1.03077	0.883481
1367996_a_at	1.04188	0.880041	-1.00205	0.996302	1.13451	0.506892
1367997_at	1.03497	0.89639	1.03562	0.8939	1.14018	0.456022
1367998_at	-1.572	0.473354	-1.42224	0.601407	-1.49177	0.538825
1367999_at	-1.02146	0.905226	-1.07069	0.584791	-1.15949	0.159758
1368000_at	-1.01352	0.915301	-1.02341	0.834006	-1.03655	0.705228
1368001_at	1.06546	0.768226	1.15704	0.38853	1.11488	0.549303
1368002_at	1.01826	0.939615	1.05985	0.743331	1.16697	0.260737
1368003_at	1.35963	0.213911	1.19896	0.511806	1.22286	0.455083
1368004_at	1.00921	0.97653	1.04196	0.865858	-1.03003	0.909402
1368005_at	1.04159	0.892768	1.06378	0.818336	-1.02504	0.940115
1368006_at	-1.07149	0.863708	-1.12301	0.730072	-1.38741	0.205786
1368007_at	-1.06063	0.907804	-1.00664	0.992595	-1.10032	0.831123
1368008_at	1.06686	0.873241	-1.0247	0.958634	-1.11371	0.751906
1368009_at	-1.17789	0.72793	-1.14231	0.793208	-1.37048	0.421996
1368010_at	-1.07198	0.845097	-1.13963	0.650888	-1.25486	0.362026
1368011_at	1.02947	0.934593	-1.01899	0.959361	1.03391	0.922008
1368012_at	-1.00136	0.997901	-1.01311	0.970325	-1.11885	0.591097
1368013_at	1.1306	0.898806	1.08571	0.936895	-1.06648	0.952036
1368014_at	1.01292	0.968069	1.03295	0.907171	1.02816	0.921889
1368015_at	1.06	0.845582	1.13638	0.580717	-1.04125	0.902401
1368016_at	1.06098	0.752592	1.3281	0.0309016	1.50364	0.0009997
1368017_at	1.13268	0.844946	1.22385	0.708434	1.34154	0.543204
1368018_at	1.02441	0.831123	1.02831	0.795917	1.08811	0.287632
1368019_at	-1.01105	0.971167	-1.07553	0.714664	1.03564	0.888652
1368020_at	1.10235	0.754514	1.07381	0.836533	1.30847	0.257101
1368021_at	1.01503	0.933376	-1.02455	0.881076	1.02199	0.8952
1368022_at	-1.04859	0.805762	-1.00555	0.985091	-1.06156	0.735676
1368023_at	-1.25774	0.577723	-1.45312	0.310213	-2.0288	0.029477
1368024_at	-1.29603	0.555531	-1.47989	0.326244	-1.95907	0.0596708
1368025_at	1.49716	0.576861	1.12459	0.909807	1.12228	0.911937
1368026_at	-1.05964	0.788765	1.01444	0.960484	1.08851	0.654831
1368027_at	1.08218	0.833679	1.05709	0.89372	-1.08486	0.827048
1368028_at	1.03353	0.926096	-1.00307	0.995434	1.00552	0.990713
1368029_at	1.03037	0.909605	-1.02856	0.916152	1.00787	0.98072
1368030_at	1.01679	0.982023	-1.04493	0.945227	-1.26276	0.570242
1368031_at	1.06953	0.818825	-1.08302	0.772548	-1.06716	0.82561
1368032_at	-1.02919	0.951653	-1.08665	0.826855	-1.03092	0.948203
1368033_at	1.06378	0.873555	1.05976	0.882269	1.10481	0.76287
1368034_at	1.04241	0.877296	1.0677	0.777083	1.07723	0.734212
1368035_a_at	1.06254	0.816439	-1.04544	0.87765	-1.04847	0.865989
1368036_at	1.01086	0.973235	-1.0064	0.986308	-1.02815	0.921104
1368037_at	-1.07571	0.728069	-1.00869	0.978934	1.03687	0.889812
1368038_at	-1.07191	0.743667	-1.2067	0.250629	-1.17452	0.340205
1368039_at	-1.05883	0.863843	-1.19353	0.450669	-1.27961	0.259394
1368040_at	-1.05432	0.883527	-1.08482	0.798561	-1.07919	0.814492
1368041_at	-1.00422	0.988128	1.05153	0.774303	1.12872	0.371349
1368042_a_at	-1.06587	0.88341	-1.08307	0.845825	1.03748	0.939423
1368043_at	-1.04594	0.854808	-1.04327	0.865858	-1.07562	0.726955
1368044_at	1.02562	0.90656	1.09907	0.515955	1.03384	0.869443
1368045_at	-1.00879	0.980108	-1.03176	0.91399	1.08246	0.721029
1368046_at	-1.07602	0.892934	-1.11321	0.826418	-1.15336	0.746144
1368047_at	-1.15143	0.583767	-1.21395	0.417088	-1.17512	0.514957
1368048_at	-1.13313	0.82501	-1.06984	0.918153	-1.03887	0.956607
1368049_at	1.0241	0.899635	1.10013	0.445253	1.15525	0.209468
1368050_at	-1.01942	0.925121	-1.02531	0.898806	-1.07549	0.60383
1368051_at	1.071	0.694151	1.05412	0.783099	1.20919	0.163096
1368052_at	-1.01898	0.986906	-1.12144	0.890371	-1.16282	0.844454
1368053_at	1.15395	0.608063	-1.01416	0.976204	-1.00717	0.989472
1368054_at	-1.08484	0.840509	-1.11634	0.763615	-1.00615	0.99221
1368055_a_at	1.02222	0.975104	-1.06427	0.917436	-1.03805	0.954205
1368056_at	1.07857	0.706395	1.00621	0.985997	-1.0272	0.920107
1368057_at	-1.07173	0.694601	1.00527	0.986827	1.17407	0.26158
1368058_at	1.01367	0.961844	-1.01311	0.963358	-1.04541	0.845126
1368059_at	-1.03817	0.966811	-1.14584	0.849913	-1.02344	0.980813
1368060_at	-1.09749	0.735991	-1.02426	0.950265	-1.04941	0.886731
1368061_at	1.03088	0.926993	1.05746	0.846644	1.02701	0.937208
1368062_at	1.0393	0.901631	1.06559	0.814828	1.08016	0.75969
1368063_a_at	1.0164	0.925817	-1.02312	0.889201	1.00633	0.974844
1368064_a_at	1.19681	0.666423	1.91108	0.0419261	2.95894	0.000493273
1368065_at	1.0537	0.878109	1.00849	0.985891	1.00203	0.997315
1368066_at	1.00857	0.987944	-1.08547	0.825598	-1.04934	0.909364
1368067_at	-1.02267	0.90656	-1.0174	0.931774	-1.01618	0.936732
1368068_a_at	1.0512	0.905731	1.0602	0.885508	1.21307	0.491191
1368069_at	1.05115	0.765107	1.05617	0.73485	1.05129	0.764126
1368070_at	1.02757	0.872048	-1.00847	0.966919	1.01772	0.923239
1368071_at	-1.06973	0.613826	-1.08498	0.522278	-1.04747	0.757931
1368072_at	1.01788	0.976637	-1.04327	0.937368	-1.10107	0.82886
1368073_at	-1.11508	0.701278	-1.13107	0.652775	-1.34933	0.173972
1368074_at	-1.09151	0.753798	-1.04551	0.896641	1.07712	0.800994
1368075_at	-1.00856	0.983305	1.05228	0.864852	1.15384	0.506315
1368076_at	1.09112	0.707331	1.08366	0.736018	1.04988	0.863188
1368077_at	1.06275	0.700006	-1.01534	0.945859	1.01092	0.962578
1368078_at	-1.03397	0.965803	1.04727	0.950809	1.20872	0.720632
1368079_at	-1.09763	0.76551	-1.06889	0.849773	1.07621	0.828399
1368080_at	-1.016	0.992188	-1.20204	0.863843	-1.29558	0.7867
1368081_at	-1.05159	0.831123	-1.0361	0.891398	-1.03715	0.887422
1368082_at	-1.1985	0.440337	-1.1414	0.602027	-1.2162	0.394552
1368083_at	-1.03482	0.825381	-1.00171	0.99502	1.00278	0.990933
1368084_at	-1.00346	0.990253	1.05026	0.771266	1.01029	0.964908
1368085_at	1.01132	0.975393	-1.04572	0.878495	-1.09084	0.709584
1368086_a_at	1.00846	0.984905	1.04502	0.894945	1.14603	0.562334
1368087_a_at	-1.01655	0.967328	-1.05455	0.872307	1.08374	0.780027
1368088_at	-1.05936	0.808078	1.01187	0.97109	-1.00223	0.995905
1368089_at	1.06699	0.669561	-1.00065	0.998487	-1.04224	0.815465
1368090_at	1.03142	0.918686	1.00626	0.987415	-1.06912	0.786942
1368091_at	1.01291	0.971982	1.21623	0.309267	1.17417	0.423344
1368092_at	1.09777	0.633112	1.06521	0.777083	1.14704	0.436473
1368093_at	1.10446	0.67151	1.03062	0.926669	1.12074	0.610483
1368094_at	1.05624	0.672005	1.02519	0.881566	-1.01199	0.949535
1368095_at	-1.07555	0.758442	1.11822	0.588949	1.13016	0.54402
1368096_at	1.12314	0.50372	1.18621	0.287632	-1.01443	0.960159
1368097_a_at	-1.09494	0.78372	1.1097	0.740391	-1.01013	0.98436
1368098_a_at	1.09213	0.667295	1.10362	0.618203	1.23505	0.204404
1368099_at	-1.01764	0.932379	-1.03612	0.838152	1.00584	0.980538
1368100_at	1.0133	0.966238	-1.0228	0.938573	-1.003	0.993849
1368101_at	-1.00255	0.995905	1.02033	0.954258	1.05088	0.867725
1368102_at	1.20479	0.28446	1.16446	0.39784	1.1744	0.365435
1368103_at	-1.06717	0.843123	-1.11476	0.69366	-1.21296	0.413309
1368104_at	1.08035	0.886731	-1.08573	0.878495	-1.13825	0.780322
1368105_at	1.12254	0.822775	-1.087	0.882858	-1.15676	0.757966
1368106_at	1.09197	0.667295	1.04611	0.860276	1.1498	0.438963
1368107_at	1.14684	0.460948	1.03901	0.888803	1.04223	0.878109
1368108_at	1.66586	0.600314	1.12943	0.93347	1.08024	0.959413
1368109_at	1.02348	0.972966	-1.05092	0.935865	-1.03832	0.953076
1368110_a_at	-1.02346	0.933726	1.06522	0.768859	1.06813	0.755119
1368111_at	1.0145	0.972213	1.05683	0.865858	1.0485	0.889052
1368112_at	-1.00937	0.975693	1.0046	0.989614	1.00559	0.986976
1368113_at	-1.11937	0.634314	1.02033	0.955631	-1.06719	0.820164
1368114_at	1.18312	0.828383	1.11161	0.904286	1.0759	0.937585
1368115_at	1.17789	0.698136	1.23889	0.581293	1.38799	0.350405
1368116_a_at	1.02163	0.949038	1.00345	0.993689	-1.02306	0.945169
1368117_at	1.05212	0.843326	1.04699	0.863095	1.09499	0.66701
1368118_at	1.1587	0.564442	1.016	0.970887	1.00283	0.996025
1368119_at	1.01591	0.950505	1.01924	0.938696	1.06386	0.733103
1368120_at	-1.00846	0.976204	1.058	0.769943	1.11167	0.503888
1368121_at	-1.09943	0.889201	-1.04283	0.956385	1.92813	0.103256
1368122_at	1.02135	0.939229	1.08007	0.694263	1.07431	0.720728
1368123_at	-1.05968	0.807013	-1.03653	0.895145	-1.11583	0.567205
1368124_at	1.01406	0.977348	-1.03042	0.946833	1.12424	0.712376
1368125_at	-1.06169	0.717471	1.03244	0.875903	-1.09423	0.537189
1368126_at	-1.0243	0.967779	-1.04151	0.941138	-1.02211	0.97109
1368127_at	-1.00445	0.995346	-1.1322	0.744513	-1.00737	0.991181
1368128_at	-1.02203	0.980133	-1.00093	0.999416	-1.22221	0.716105
1368129_at	-1.01218	0.96598	-1.03598	0.882555	1.04814	0.830386
1368130_at	1.03148	0.896154	1.03372	0.886856	-1.04325	0.845825
1368131_at	1.4073	0.539807	1.09132	0.915673	1.12866	0.876129
1368132_at	-1.15636	0.591505	-1.08018	0.817797	1.07886	0.821408
1368133_at	1.0864	0.822384	-1.00229	0.997635	1.03488	0.93908
1368134_a_at	1.01608	0.964711	1.04675	0.881468	1.00247	0.996025
1368135_at	1.2578	0.212505	1.09529	0.69366	1.06923	0.794029
1368136_at	1.02164	0.959601	-1.02028	0.962439	-1.00716	0.989044
1368137_at	1.02604	0.9469	-1.00136	0.998213	1.01314	0.97542
1368138_at	1.04351	0.902992	1.18628	0.457825	1.12186	0.653027
1368139_s_at	-1.00649	0.990941	1.0648	0.871856	1.0569	0.889241
1368140_at	-1.00323	0.994403	1.04283	0.889742	1.03952	0.89961
1368141_at	1.00065	0.997949	1.00612	0.972213	-1.01584	0.917231
1368142_at	-1.01121	0.979437	1.00926	0.983672	1.06863	0.831317
1368143_at	-1.04974	0.905017	1.06061	0.880041	1.0492	0.905973
1368144_at	-1.11246	0.729566	-1.11433	0.724204	-1.11428	0.723268
1368145_at	1.03571	0.914718	-1.01069	0.978279	1.05801	0.847713
1368146_at	-1.2271	0.787651	-1.09727	0.920382	-1.18595	0.831411
1368147_at	-1.16925	0.87148	-1.24054	0.804521	-1.30481	0.740885
1368148_at	1.08924	0.825404	1.04118	0.930892	-1.00686	0.991148
1368149_at	-1.05968	0.802624	1.02622	0.927382	-1.0397	0.881533
1368150_at	-1.00166	0.994215	1.05116	0.666423	1.07748	0.469381
1368151_at	1.01907	0.920353	-1.03069	0.859812	1.038	0.815954
1368152_at	-1.09	0.620145	-1.01606	0.952488	-1.10078	0.568276
1368153_a_at	1.16459	0.528032	1.04256	0.906599	-1.09035	0.762682
1368154_at	1.03553	0.93338	-1.04727	0.906902	-1.16405	0.580972
1368155_at	-1.1655	0.867135	-1.16897	0.86411	-1.1186	0.908494
1368156_at	1.00741	0.978937	1.03679	0.867135	1.00098	0.998021
1368157_at	1.03159	0.893233	1.08598	0.627392	-1.0209	0.933991
1368158_at	1.00826	0.988843	-1.07017	0.866861	1.08008	0.842647
1368159_at	1.00475	0.987729	-1.02391	0.920281	1.02731	0.90716
1368160_at	-1.03374	0.942646	1.05577	0.898584	-1.12315	0.728116
1368161_a_at	1.02322	0.797458	1.00605	0.958634	-1.00018	0.999416
1368162_at	1.06351	0.766116	1.12679	0.480926	1.15541	0.372973
1368163_at	1.10169	0.782681	1.12477	0.720051	1.20963	0.501646
1368164_at	1.00629	0.986976	1.00204	0.996401	-1.04688	0.864885
1368165_at	-1.08784	0.812261	-1.14704	0.648484	-1.0515	0.90246
1368166_at	1.07869	0.726301	1.07681	0.733491	1.19703	0.298019
1368167_at	-1.0553	0.964595	-1.15425	0.890622	-1.24931	0.808196
1368168_at	1.02405	0.967781	-1.01405	0.982683	1.29256	0.439862
1368169_at	1.02478	0.915489	1.12102	0.443274	1.10234	0.528672
1368170_at	1.00376	0.990806	1.10136	0.549228	1.05509	0.781847
1368171_at	1.44768	0.549617	1.06687	0.9469	1.35917	0.635508
1368172_a_at	1.12991	0.859017	-1.12162	0.870729	1.42155	0.474724
1368173_at	-1.04949	0.891256	-1.09714	0.748512	1.02361	0.953298
1368174_at	-1.11535	0.896869	-1.30922	0.671477	1.00626	0.996225
1368175_at	-1.10427	0.415773	-1.10401	0.417604	-1.087	0.507603
1368176_at	1.01952	0.904095	1.01519	0.928344	-1.03164	0.824484
1368177_at	1.04701	0.922972	1.1127	0.781332	1.28255	0.404425
1368178_at	1.03147	0.903787	1.11232	0.545214	1.25605	0.121555
1368179_at	1.02444	0.897723	1.02992	0.869712	-1.02561	0.89105
1368180_s_at	-1.01371	0.984377	1.79767	0.0512374	2.26827	0.00337736
1368181_at	-1.01756	0.954123	-1.02938	0.91732	1.13845	0.474724
1368182_at	1.11162	0.666963	1.12663	0.614888	1.0785	0.78372
1368183_at	1.03525	0.851525	-1.05423	0.741961	-1.07429	0.619687
1368184_at	-1.09503	0.767596	1.05513	0.882178	1.14795	0.604624
1368185_at	-1.01859	0.966382	-1.05188	0.893171	-1.14597	0.618727
1368186_a_at	-1.01519	0.970091	-1.10904	0.688144	-1.14959	0.555423
1368187_at	-1.34633	0.421535	-1.44167	0.300801	-1.69731	0.104954
1368188_at	-1.02825	0.91585	1.03895	0.878223	1.13367	0.46375
1368189_at	1.06625	0.900472	1.01982	0.974385	1.3911	0.305329
1368190_at	1.01688	0.962419	1.00724	0.986645	1.00172	0.997644
1368191_a_at	-1.06339	0.858348	1.53116	0.0433641	1.67635	0.00947136
1368192_at	-1.02603	0.923434	1.12767	0.489646	1.00179	0.996553
1368193_at	-1.00939	0.963561	1.01532	0.937257	-1.01909	0.918563
1368194_at	1.04542	0.835627	1.02574	0.917436	1.05397	0.795625
1368195_at	-1.00766	0.984796	1.02717	0.934114	-1.00265	0.995544
1368196_at	1.73757	0.703032	2.9716	0.367014	1.07691	0.973428
1368197_at	1.03084	0.914641	1.16129	0.410082	1.17325	0.36865
1368198_at	-1.06898	0.716853	1.14822	0.359834	1.12001	0.470799
1368199_at	1.03023	0.875818	1.00358	0.989544	1.06275	0.683376
1368200_at	1.22468	0.262098	1.20076	0.320814	1.22456	0.261993
1368201_at	-1.02077	0.960159	-1.14055	0.618561	-1.21145	0.424806
1368202_a_at	-1.00463	0.992841	-1.17624	0.513875	-1.0956	0.757667
1368203_at	1.06859	0.607905	1.19357	0.0901296	1.04103	0.792371
1368204_at	1.07502	0.777014	-1.05071	0.86402	1.04315	0.887686
1368205_at	-1.01526	0.945153	-1.06448	0.682186	-1.13977	0.301875
1368206_at	-1.01722	0.934663	1.0214	0.915302	1.18452	0.141296
1368207_at	-1.23643	0.466963	-1.36662	0.244393	-1.64804	0.0431353
1368208_at	-1.25034	0.397724	-1.4144	0.150869	-1.57465	0.0469561
1368209_at	-1.00404	0.991776	1.09892	0.642103	1.02228	0.941138
1368210_at	1.04652	0.865192	1.05528	0.831915	-1.01006	0.976637
1368211_at	-1.00245	0.988612	1.01434	0.911209	-1.00794	0.95456
1368212_at	-1.02549	0.923609	-1.03992	0.87183	-1.08638	0.659714
1368213_at	-1.20399	0.678224	1.36747	0.422328	1.45629	0.313955
1368214_at	-1.00296	0.989544	1.00361	0.986906	1.0457	0.727431
1368215_at	-1.03042	0.866375	-1.14214	0.253485	-1.13931	0.264132
1368216_at	-1.05045	0.765107	-1.08266	0.57344	-1.04457	0.799582
1368217_at	-1.06045	0.82876	-1.05238	0.857203	-1.12231	0.594654
1368218_at	-1.05835	0.860409	-1.07677	0.803364	-1.11982	0.658404
1368219_at	-1.06636	0.883312	-1.09437	0.821665	-1.10084	0.804841
1368220_at	-1.11517	0.615079	-1.06068	0.825241	-1.07122	0.785283
1368221_at	-1.06321	0.806163	-1.11546	0.596685	-1.09194	0.689185
1368222_at	-1.10658	0.554453	-1.10092	0.577311	-1.14815	0.381877
1368223_at	1.01046	0.977634	1.00339	0.993939	1.05961	0.833071
1368224_at	-1.25225	0.419887	-1.25065	0.422328	-1.4841	0.109037
1368225_at	1.05427	0.819376	1.00984	0.975393	1.00293	0.993803
1368226_at	-1.01025	0.979683	1.03504	0.917158	1.18532	0.421996
1368227_at	-1.16552	0.417088	-1.24703	0.205786	-1.19815	0.317387
1368228_at	-1.05661	0.838609	-1.04045	0.893544	-1.05304	0.851534
1368229_at	-1.00366	0.992775	-1.04875	0.858001	-1.08237	0.723178
1368230_a_at	-1.01946	0.923157	1.01368	0.948914	1.06152	0.681575
1368231_at	1.06498	0.685054	1.01271	0.955825	-1.03174	0.873439
1368232_at	1.1236	0.716105	1.19594	0.526533	1.38476	0.186252
1368233_at	1.14982	0.421328	1.05074	0.833925	1.23451	0.181421
1368234_at	1.00386	0.992324	1.01368	0.966811	1.08108	0.725273
1368235_at	1.05099	0.854662	1.06222	0.81401	1.0505	0.856346
1368236_at	1.03781	0.851035	1.03633	0.858045	1.02304	0.91732
1368237_at	1.29466	0.829155	-1.13627	0.928122	1.16978	0.907859
1368238_at	-1.44051	0.604687	-1.47095	0.579653	-1.36424	0.675345
1368239_at	-1.15573	0.498461	-1.09403	0.714537	-1.09979	0.692528
1368240_a_at	1.02958	0.929104	-1.10502	0.667594	-1.16137	0.470566
1368241_a_at	1.00778	0.989199	1.02159	0.96399	-1.11388	0.746274
1368242_at	1.08807	0.781607	1.05429	0.880732	-1.02056	0.960149
1368243_at	1.05996	0.800521	1.00178	0.996672	-1.01447	0.962308
1368244_at	-1.07517	0.762952	-1.03749	0.900464	-1.06353	0.808196
1368245_at	1.00492	0.991211	1.0031	0.995144	1.12342	0.614856
1368246_at	-1.1646	0.509201	-1.06834	0.826627	-1.08873	0.757667
1368247_at	-1.00262	0.997588	-1.05687	0.907859	-1.09566	0.827699
1368248_at	-1.14991	0.5975	-1.02083	0.960736	-1.03575	0.928122
1368249_at	-1.11176	0.790228	-1.0975	0.823449	-1.16434	0.663619
1368250_at	-1.01207	0.969683	-1.00208	0.996025	1.0745	0.731678
1368251_at	-1.20623	0.483113	-1.15761	0.607817	-1.31864	0.261993
1368252_at	2.63497	0.566334	1.26851	0.924445	1.42226	0.879892
1368253_at	1.19391	0.436294	1.32792	0.167966	1.39573	0.0961734
1368254_a_at	1.09966	0.898256	1.06694	0.935199	-1.04179	0.961175
1368255_at	-1.02726	0.937795	-1.00411	0.992775	-1.08229	0.761747
1368256_at	1.06243	0.79367	1.05112	0.839632	1.08294	0.703267
1368257_at	-1.05046	0.812533	1.01893	0.942313	1.03658	0.875669
1368258_at	1.10277	0.546944	1.09144	0.600096	1.05959	0.761023
1368259_at	-1.08356	0.789681	-1.13022	0.638184	-1.32316	0.190561
1368260_at	-1.06995	0.86811	-1.22745	0.47515	-1.1185	0.744248
1368261_at	1.01978	0.954792	-1.02179	0.949989	1.08547	0.741504
1368262_at	-1.14718	0.469967	-1.18441	0.351298	-1.1004	0.647898
1368263_a_at	1.10107	0.466062	1.13797	0.299141	1.00241	0.993288
1368264_at	1.02912	0.945859	1.02981	0.94449	1.15333	0.606029
1368265_at	-1.07644	0.835754	1.14549	0.640127	1.2972	0.296216
1368266_at	-1.23714	0.543628	-1.19554	0.625909	-1.11121	0.80918
1368267_at	1.00922	0.981218	-1.02947	0.93085	1.01512	0.966849
1368268_at	-1.02628	0.935046	-1.10727	0.640136	1.00272	0.995346
1368269_at	1.01858	0.968191	-1.00737	0.989256	1.01469	0.975485
1368270_at	-1.23464	0.531066	-1.19481	0.612515	-1.2833	0.438836
1368271_a_at	-1.12508	0.852201	1.17826	0.772793	1.04448	0.954339
1368272_at	-1.34641	0.394713	-1.50087	0.215336	-1.41436	0.306629
1368273_at	1.01926	0.95392	-1.08684	0.719891	1.04016	0.893083
1368274_at	1.07041	0.744433	1.00592	0.986827	1.02128	0.940119
1368275_at	1.37031	0.669991	1.36119	0.678681	1.92587	0.28978
1368276_at	1.13894	0.47485	1.10082	0.626457	1.00232	0.995687
1368277_at	1.08963	0.802027	1.02232	0.960962	1.23071	0.428864
1368278_at	-1.04783	0.924913	-1.11179	0.793002	-1.30026	0.393226
1368279_at	-1.20634	0.766251	-1.37075	0.55791	-1.26215	0.691062
1368280_at	-1.12678	0.645165	-1.05702	0.868065	-1.15015	0.569402
1368281_at	1.12843	0.528024	1.14059	0.48064	1.09002	0.681164
1368282_at	1.03608	0.906202	-1.03625	0.905762	1.04134	0.889201
1368283_at	-1.0646	0.918631	1.38248	0.402274	1.82179	0.0808696
1368284_at	1.10774	0.640136	1.07059	0.78645	-1.02957	0.925228
1368285_at	-1.03511	0.917158	1.10722	0.675536	1.0863	0.750589
1368286_at	-1.00706	0.98261	-1.07073	0.731046	-1.02049	0.940303
1368287_at	1.11408	0.712954	-1.08183	0.810504	-1.0349	0.932085
1368288_at	-1.0019	0.990462	-1.04356	0.603369	-1.05393	0.498012
1368289_at	-1.05464	0.903159	-1.2483	0.437473	-1.26843	0.396132
1368290_at	1.01109	0.992503	1.13917	0.86844	1.04414	0.963083
1368291_at	-1.00085	0.998551	-1.00666	0.985848	-1.06657	0.778784
1368292_at	1.04884	0.782341	1.05589	0.740405	-1.03141	0.875905
1368293_at	1.04812	0.870751	1.01958	0.953941	1.08816	0.720342
1368294_at	-1.0109	0.977098	-1.00588	0.989199	-1.0367	0.909118
1368295_at	-1.05665	0.885981	-1.06624	0.862937	-1.02196	0.961159
1368296_at	-1.25361	0.287783	-1.12354	0.638172	-1.11162	0.678173
1368297_at	1.18043	0.647421	1.06642	0.895051	1.0278	0.960484
1368298_at	-1.07678	0.625909	-1.03558	0.857604	-1.03893	0.839632
1368299_at	-1.01252	0.965502	-1.02114	0.938492	1.01119	0.970091
1368300_at	-1.01101	0.978937	-1.04829	0.886155	1.10218	0.709992
1368301_at	1.01186	0.972851	-1.00624	0.987281	1.03944	0.892244
1368302_at	-1.05297	0.79975	-1.05371	0.796441	-1.032	0.893233
1368303_at	1.3851	0.363948	1.11576	0.825637	1.30476	0.477097
1368304_at	1.40212	0.581349	1.49462	0.493324	1.62558	0.385982
1368305_at	1.0659	0.82312	-1.0343	0.919128	-1.15983	0.495783
1368306_at	-1.07403	0.676228	-1.08515	0.618196	-1.04297	0.83607
1368307_at	1.07554	0.555531	1.15158	0.182073	1.09233	0.449479
1368308_at	1.1367	0.773688	-1.01111	0.987792	1.14001	0.76551
1368309_at	-1.01156	0.974101	-1.12293	0.577068	-1.04089	0.889874
1368310_at	1.36139	0.65557	1.23224	0.791202	1.2867	0.731039
1368311_at	-1.09819	0.785047	-1.00421	0.994655	1.05403	0.896728
1368312_at	1.08466	0.692268	1.07181	0.748702	1.0351	0.897316
1368313_a_at	-1.11751	0.680113	-1.08424	0.78839	-1.05873	0.864885
1368314_at	1.05105	0.918597	1.05346	0.913998	-1.01674	0.976665
1368315_at	1.03642	0.886801	1.06018	0.78839	-1.00366	0.992018
1368316_at	1.07794	0.824288	1.15301	0.60137	1.25014	0.36012
1368317_at	1.0238	0.955768	1.08386	0.806641	1.15863	0.58386
1368318_at	1.02513	0.937214	1.0135	0.969122	1.14271	0.501414
1368319_a_at	-1.0593	0.909941	-1.15814	0.706562	1.04252	0.938857
1368320_at	1.02737	0.939593	1.10285	0.699689	1.09649	0.721829
1368321_at	1.3916	0.616891	1.14287	0.880283	1.07918	0.938472
1368322_at	1.05672	0.908819	1.01196	0.984932	-1.04545	0.92988
1368323_at	1.03916	0.867724	1.08076	0.669926	1.04461	0.843226
1368324_at	1.07506	0.711182	-1.00181	0.99633	1.03063	0.9055
1368325_at	-1.14937	0.473361	-1.11827	0.587389	-1.18323	0.365435
1368326_at	-1.02182	0.928975	-1.09605	0.568484	-1.01608	0.949411
1368327_at	-1.00128	0.998213	1.05427	0.86534	-1.00417	0.992854
1368328_at	-1.28503	0.345404	-1.25584	0.398635	-1.36557	0.218651
1368329_at	1.11155	0.622217	1.1991	0.336143	1.16931	0.421996
1368330_at	1.07696	0.751339	1.20116	0.315486	1.30027	0.119767
1368331_at	-1.10887	0.483685	1.03631	0.863254	1.04297	0.829194
1368332_at	1.01975	0.987311	-1.16091	0.862791	-1.30849	0.70207
1368333_at	1.12414	0.319642	1.13124	0.292132	-1.00377	0.987988
1368334_at	-1.01589	0.974156	-1.14403	0.655854	-1.31083	0.287967
1368335_at	1.02081	0.878109	-1.00215	0.991181	-1.0034	0.985264
1368336_at	1.04194	0.878125	1.1925	0.311965	1.36809	0.043578
1368337_at	1.22344	0.328664	1.17131	0.4669	1.1623	0.492427
1368338_at	-1.08331	0.949068	-1.18561	0.877517	-1.28557	0.795113
1368339_at	-1.89381	0.399732	-1.74863	0.474052	-2.82523	0.129476
1368340_at	-1.05934	0.853404	-1.12885	0.619137	-1.09602	0.730134
1368341_at	1.06158	0.827944	1.11771	0.617648	1.19341	0.372973
1368342_at	1.05776	0.949989	-1.20037	0.79072	-1.30422	0.659714
1368343_at	1.10296	0.580972	1.17408	0.310213	1.17977	0.295344
1368344_at	-1.02478	0.926394	-1.03663	0.883387	-1.082	0.679192
1368345_at	1.1229	0.530967	1.0404	0.878753	1.10457	0.603908
1368346_at	-1.04684	0.711749	1.00644	0.973034	1.07309	0.516385
1368347_at	1.16536	0.640255	1.16683	0.636771	1.10145	0.800454
1368348_at	-1.03924	0.92878	1.04629	0.913162	-1.00599	0.991716
1368349_at	-1.00054	0.999347	-1.01266	0.966748	1.00202	0.996043
1368350_at	-1.58486	0.445288	-1.70285	0.361522	-1.82103	0.295653
1368351_at	1.07295	0.764384	1.06426	0.799664	1.04659	0.866087
1368352_at	1.09954	0.736519	1.06901	0.834006	1.08103	0.7975
1368353_at	1.03672	0.961883	-1.12935	0.839492	-1.03072	0.969145
1368354_at	-1.04241	0.872301	1.06853	0.764632	1.29479	0.0994853
1368355_at	-1.01326	0.982121	1.05984	0.900778	1.15053	0.69258
1368356_a_at	-1.0382	0.882705	1.01993	0.944831	1.01585	0.956396
1368357_at	-1.00367	0.992595	1.08824	0.691062	-1.01836	0.953172
1368358_a_at	1.14878	0.628818	1.00668	0.990253	1.14833	0.629239
1368359_a_at	-1.07221	0.577299	-1.01796	0.922916	-1.06623	0.615935
1368360_at	-1.03639	0.830841	-1.04638	0.769224	-1.06153	0.669969
1368361_a_at	-1.01828	0.916188	-1.03871	0.789227	1.0179	0.918176
1368362_a_at	1.02518	0.937168	1.08552	0.72116	-1.04224	0.884302
1368363_at	1.03811	0.961844	-1.11373	0.869768	1.12064	0.859003
1368364_at	1.11399	0.494946	1.13785	0.394636	1.03431	0.881566
1368365_at	1.05085	0.841023	1.01249	0.969252	1.18458	0.327151
1368366_at	1.16063	0.615079	1.16465	0.60409	1.12155	0.721227
1368367_at	1.06191	0.763439	1.01225	0.965347	-1.01688	0.950265
1368368_a_at	-1.02203	0.941564	1.08081	0.717033	-1.00442	0.990816
1368369_at	-1.08662	0.703078	-1.04501	0.871208	-1.12089	0.564476
1368370_at	-1.03294	0.931543	-1.10087	0.730193	-1.09019	0.765107
1368371_at	-1.04217	0.906003	-1.03212	0.931779	-1.01891	0.961844
1368372_at	1.16649	0.670031	1.09044	0.843695	-1.15455	0.696499
1368373_at	-1.00047	0.999416	1.03766	0.898794	-1.03701	0.900309
1368374_a_at	-1.25182	0.551984	1.15462	0.738439	1.45501	0.263719
1368375_a_at	-1.03873	0.919127	-1.13835	0.621077	-1.23482	0.363386
1368376_at	-1.12773	0.834424	1.05302	0.94068	-1.05677	0.936009
1368377_at	-1.15201	0.592015	-1.02176	0.958481	-1.2105	0.435103
1368378_at	1.15527	0.310024	1.16643	0.273513	1.4381	0.00258851
1368379_at	-1.00611	0.988128	1.17803	0.412589	1.30881	0.134209
1368380_at	-1.01508	0.926394	-1.08718	0.408392	-1.14018	0.153017
1368381_at	1.00301	0.991909	1.01086	0.963637	1.02281	0.915619
1368382_at	1.09925	0.625333	1.08309	0.696326	-1.03863	0.883387
1368383_at	1.01797	0.92878	1.08376	0.537356	1.05637	0.706334
1368384_at	1.07797	0.670893	1.07703	0.675536	1.07077	0.706334
1368385_a_at	1.08019	0.608	1.07414	0.642993	1.06175	0.712822
1368386_at	1.00929	0.967302	-1.01744	0.933721	1.0363	0.838259
1368387_at	1.08066	0.78996	1.05441	0.872307	1.13577	0.60411
1368388_at	-1.01527	0.96766	-1.03881	0.906651	1.05352	0.862791
1368389_at	-1.00083	0.998726	-1.02252	0.943833	-1.00629	0.987197
1368390_at	1.03933	0.907171	1.13913	0.570289	1.11449	0.654831
1368391_at	1.03567	0.965065	-1.09989	0.889405	-1.0247	0.976746
1368392_at	-1.00587	0.994886	-1.16318	0.751621	-1.02752	0.968615
1368393_at	1.12979	0.651446	1.02247	0.956208	-1.0183	0.965347
1368394_at	1.10251	0.799634	1.18381	0.598244	1.07476	0.864194
1368395_at	-1.14862	0.789417	-1.29946	0.536657	-1.33951	0.475691
1368396_at	1.39614	0.809466	2.38986	0.401221	-1.07403	0.969889
1368397_at	-1.01979	0.930966	1.27104	0.0463509	1.25541	0.0596708
1368398_at	1.01999	0.966238	-1.01528	0.975393	-1.03293	0.941138
1368399_a_at	-1.0181	0.965991	1.0433	0.908683	1.1238	0.669319
1368400_at	-1.14918	0.477027	-1.039	0.895051	1.01986	0.951579
1368401_at	-1.14958	0.651078	-1.27784	0.357201	-1.13559	0.687073
1368402_at	1.00282	0.992503	-1.03653	0.854349	-1.02097	0.924564
1368403_at	-1.19682	0.329998	-1.19776	0.327654	-1.17827	0.381551
1368404_at	1.06238	0.853025	-1.04601	0.89892	1.10191	0.727431
1368405_at	-1.00532	0.990672	1.00288	0.995544	1.07603	0.789091
1368406_at	-1.03525	0.871749	-1.12491	0.424885	-1.11838	0.450827
1368407_at	1.0693	0.653883	1.04728	0.785283	1.0878	0.546944
1368408_at	1.0353	0.911529	1.03368	0.916188	1.24374	0.249256
1368409_at	-1.03176	0.907534	1.30555	0.0825388	1.45053	0.00947136
1368410_at	1.04318	0.900094	1.0244	0.947964	-1.03798	0.912992
1368411_a_at	1.04218	0.827288	1.05028	0.783903	1.00886	0.972213
1368412_a_at	-1.00423	0.995354	-1.13208	0.733138	-1.22128	0.527004
1368413_at	-1.0154	0.969842	-1.0148	0.971031	1.00271	0.995964
1368414_at	1.03804	0.883387	1.12972	0.491375	1.01861	0.948914
1368415_at	1.9448	0.689687	1.12444	0.96227	1.73064	0.757329
1368416_at	1.09963	0.63915	1.07615	0.739058	1.09025	0.678285
1368417_at	1.0034	0.991583	1.08199	0.637025	1.04918	0.807794
1368418_a_at	-1.09758	0.810879	-1.10432	0.794395	-1.23287	0.485692
1368419_at	-1.03924	0.912899	1.08274	0.78434	1.09828	0.73081
1368420_at	-1.0532	0.844047	-1.04927	0.85859	-1.12127	0.572213
1368421_at	1.01256	0.958333	1.04249	0.827528	-1.04556	0.811151
1368422_at	1.84531	0.264132	3.59575	0.0114238	3.36888	0.0114238
1368423_at	-1.02847	0.92189	1.13338	0.506315	1.05278	0.835754
1368424_at	1.02363	0.937492	-1.09379	0.664386	-1.19887	0.297243
1368425_at	1.09283	0.604687	1.15344	0.351382	1.08787	0.628202
1368426_at	1.10981	0.770948	1.15042	0.664898	1.16596	0.623711
1368427_at	1.03901	0.919132	-1.04077	0.915298	1.06834	0.842395
1368428_at	1.02273	0.975369	-1.13926	0.800516	1.05113	0.938627
1368429_at	-1.08371	0.807545	-1.0656	0.857863	-1.09657	0.768545
1368430_at	-1.10329	0.504637	-1.11302	0.458407	-1.18297	0.201534
1368431_at	-1.05122	0.87216	-1.02039	0.955247	1.02741	0.938168
1368432_a_at	-1.00157	0.997901	-1.06375	0.826961	-1.00915	0.981665
1368433_at	1.06386	0.636771	-1.01195	0.952283	1.09564	0.439378
1368434_at	-1.11145	0.61418	-1.12145	0.575029	-1.14774	0.478951
1368435_at	-1.05349	0.953508	-1.80686	0.228374	-1.12546	0.878753
1368436_at	-1.0503	0.782491	1.00223	0.994364	1.09612	0.528171
1368437_at	1.13348	0.529259	1.08402	0.722179	1.0165	0.959422
1368438_at	1.1278	0.538142	1.2489	0.19193	1.11044	0.603704
1368439_at	1.06291	0.807267	1.04127	0.885945	1.03938	0.891841
1368440_at	1.13605	0.364253	1.17189	0.239152	1.16802	0.251343
1368441_at	-1.00318	0.99556	-1.15574	0.567205	-1.00432	0.993318
1368442_at	-1.01985	0.863575	-1.01165	0.927764	-1.07481	0.351065
1368443_at	1.12765	0.647777	1.19348	0.454443	1.06911	0.833305
1368444_at	-1.06986	0.831767	1.02617	0.947376	-1.03598	0.923538
1368445_at	-1.06387	0.77637	-1.00951	0.976182	1.03667	0.887965
1368446_at	-1.53728	0.531509	-1.18126	0.857846	-1.31175	0.729726
1368447_x_at	-1.44392	0.658762	1.05026	0.970517	-1.52248	0.597516
1368448_at	1.09931	0.6681	1.10344	0.65289	1.0831	0.731562
1368449_at	1.01962	0.923538	-1.01878	0.928019	-1.01957	0.923538
1368450_at	-1.13347	0.742275	-1.32781	0.351382	-1.16623	0.664898
1368451_at	-1.00978	0.970481	1.10973	0.483685	-1.04411	0.825637
1368452_at	1.04729	0.90656	-1.03098	0.942359	-1.02504	0.954339
1368453_at	1.13762	0.828179	1.05161	0.944831	1.40828	0.436294
1368454_at	-1.01306	0.967881	1.08271	0.71225	1.05292	0.835246
1368455_at	-1.00076	0.999416	-1.05048	0.958871	-1.35953	0.619174
1368456_at	1.12856	0.65727	1.1581	0.567205	1.00562	0.991181
1368457_at	1.08406	0.721969	1.07403	0.762911	1.01815	0.955111
1368458_at	1.44548	0.389184	-1.24116	0.660882	1.2205	0.69258
1368459_at	-1.01049	0.987618	-1.09139	0.849856	1.11295	0.804128
1368460_at	1.08717	0.79377	1.01522	0.97305	1.0773	0.822775
1368461_at	-1.05952	0.868582	-1.08249	0.801927	-1.17141	0.531033
1368462_at	-1.02101	0.946833	1.01515	0.962601	-1.05589	0.82917
1368463_at	-1.02522	0.919959	-1.03132	0.897723	1.03786	0.87148
1368464_at	1.0422	0.897257	1.0993	0.701414	1.04981	0.874925
1368465_at	1.08906	0.708128	-1.02258	0.944522	1.12959	0.552189
1368466_a_at	-1.10435	0.751653	-1.24401	0.384717	-1.23439	0.404213
1368467_at	1.11924	0.600992	1.04355	0.88436	1.09991	0.67461
1368468_at	1.07502	0.767781	1.05064	0.858954	-1.01633	0.961822
1368469_at	-1.0124	0.973148	1.04619	0.880222	-1.0428	0.890181
1368470_at	-1.09848	0.701309	-1.11565	0.63875	-1.10741	0.667767
1368471_at	1.0628	0.839492	1.18376	0.443385	1.08279	0.772122
1368472_at	1.06778	0.728116	1.21267	0.178829	1.06686	0.731833
1368473_at	-1.01278	0.971999	1.01238	0.972903	-1.01824	0.956746
1368474_at	-1.04403	0.898309	-1.214	0.371334	-1.44971	0.0512374
1368475_at	-1.14282	0.62027	1.14929	0.602027	1.18113	0.511616
1368476_at	1.05711	0.846639	1.04273	0.89269	1.17361	0.438963
1368477_at	1.05999	0.90666	-1.13212	0.75643	-1.22872	0.545661
1368478_at	-1.07648	0.772256	-1.01322	0.971513	-1.03679	0.9075
1368479_at	1.03838	0.872957	1.08533	0.653027	1.02458	0.923888
1368480_at	1.0569	0.821687	1.0228	0.940031	1.07577	0.741329
1368481_at	-1.02534	0.912904	-1.00557	0.985146	1.01546	0.950516
1368482_at	-1.00338	0.996553	-1.05413	0.915542	-1.30771	0.392721
1368483_a_at	1.0089	0.973148	1.06089	0.738266	1.02341	0.919194
1368484_at	-1.15206	0.74253	-1.23649	0.575029	-1.45697	0.258035
1368485_at	-1.04724	0.923862	1.05358	0.912308	-1.11786	0.77159
1368486_at	-1.1748	0.530422	-1.26142	0.326244	-1.32847	0.210065
1368487_at	-1.09683	0.878495	1.10553	0.864852	1.0145	0.986511
1368488_at	-1.27512	0.361203	-1.27237	0.365103	-1.26613	0.376307
1368489_at	-1.01937	0.960889	-1.01506	0.971031	-1.07119	0.821814
1368490_at	1.19527	0.617602	-1.07459	0.881076	-1.19474	0.617648
1368491_at	1.03129	0.927447	1.13567	0.572714	-1.00373	0.993508
1368492_at	-1.05057	0.883251	-1.04286	0.904691	-1.1621	0.528032
1368493_at	1.08483	0.71225	-1.00565	0.988128	-1.00924	0.978934
1368494_at	-1.07311	0.915674	-1.26585	0.6155	-1.46797	0.356162
1368495_at	1.05851	0.786782	1.14098	0.421714	1.16218	0.344694
1368496_at	1.01399	0.967881	1.11655	0.603215	1.05968	0.825233
1368497_at	1.07047	0.888785	1.30665	0.410419	1.35131	0.340307
1368498_a_at	1.03894	0.836533	1.09233	0.534738	-1.03361	0.86466
1368499_at	1.01333	0.964999	1.13711	0.465339	1.07822	0.712598
1368500_a_at	1.02229	0.918039	1.00178	0.995687	1.00873	0.971999
1368501_s_at	-1.20857	0.731046	-1.14945	0.821687	-1.43083	0.436294
1368502_at	1.10861	0.496701	1.15765	0.299141	1.11932	0.445938
1368503_at	1.01956	0.974844	-1.01382	0.983305	-1.06129	0.908292
1368504_at	-1.10449	0.629085	-1.05912	0.817259	1.02698	0.92878
1368505_at	-1.03317	0.973034	-1.17927	0.81678	1.01118	0.99221
1368506_at	-1.19187	0.731046	-1.33977	0.504765	-1.13096	0.830841
1368507_at	-1.18293	0.189142	1.04704	0.801519	1.10956	0.462849
1368508_at	1.04883	0.817044	1.14803	0.358494	1.12819	0.435868
1368509_at	-1.06664	0.896154	1.05256	0.920382	1.18642	0.637302
1368510_at	-1.03852	0.976637	-1.12299	0.915674	-1.15457	0.89105
1368511_at	-1.07933	0.827928	-1.01644	0.972213	-1.07549	0.83691
1368512_a_at	1.00736	0.989786	-1.08882	0.812904	-1.0687	0.864097
1368513_at	1.10136	0.723178	1.03561	0.9226	1.05125	0.88199
1368514_at	1.09097	0.788251	1.16935	0.561235	1.36123	0.178829
1368515_at	1.09187	0.756472	1.03326	0.928999	-1.02313	0.952832
1368516_at	-1.00995	0.974474	-1.02303	0.934434	1.02905	0.913011
1368517_at	-1.06624	0.893387	-1.10701	0.808579	-1.0891	0.847131
1368518_at	-1.07172	0.877658	-1.17174	0.642168	-1.53465	0.113169
1368519_at	-1.20968	0.794977	-1.11566	0.898806	1.03007	0.977216
1368520_at	-1.63627	0.478465	1.22755	0.823459	1.35816	0.700051
1368521_at	1.07571	0.923786	-1.08929	0.908388	-1.37808	0.524776
1368522_at	-1.04674	0.885981	-1.14369	0.556426	1.06661	0.823382
1368523_at	1.10012	0.823935	1.11311	0.794977	1.08573	0.853897
1368524_at	1.02475	0.872494	-1.01693	0.918557	1.05083	0.679069
1368525_at	-1.16571	0.513556	-1.06487	0.840098	-1.00308	0.995528
1368526_at	1.10692	0.653217	1.08396	0.740708	1.19631	0.358395
1368527_at	1.10167	0.827447	-1.09188	0.848402	-1.03202	0.954496
1368528_at	-1.298	0.339943	-1.37665	0.222857	1.02957	0.950779
1368529_at	1.03063	0.917521	1.1205	0.567179	1.0262	0.931912
1368530_at	1.19637	0.352849	1.24218	0.242952	1.21643	0.301439
1368531_at	1.02579	0.91491	1.01875	0.941195	1.00675	0.981458
1368532_at	2.33379	0.635933	4.99154	0.296563	1.32699	0.908709
1368533_at	1.05867	0.847993	-1.02361	0.947633	-1.06175	0.836211
1368534_at	-1.07894	0.770448	-1.03215	0.922882	-1.05683	0.848773
1368535_at	1.12245	0.636539	1.07226	0.809884	1.1482	0.552253
1368536_at	1.03328	0.94657	-1.02962	0.953095	1.06775	0.878709
1368537_at	-1.09613	0.733474	1.05442	0.871252	-1.16039	0.524776
1368538_at	1.16351	0.560865	1.16087	0.566352	1.12706	0.665979
1368539_at	1.04128	0.852114	1.07004	0.710381	-1.00336	0.991938
1368540_at	1.01105	0.990253	-1.16327	0.781553	-1.19403	0.728485
1368541_at	-1.03915	0.972692	-1.17359	0.853835	-1.35367	0.665383
1368542_at	1.20386	0.560699	1.25594	0.449452	1.1797	0.612515
1368543_at	1.04984	0.79339	1.13545	0.364524	1.07848	0.635946
1368544_a_at	1.17049	0.693927	1.25833	0.522711	1.14185	0.754026
1368545_at	-1.08633	0.84806	-1.19361	0.598093	-1.08028	0.860409
1368546_at	1.05433	0.878598	-1.07256	0.825637	1.10432	0.723239
1368547_at	-1.00231	0.995838	1.01334	0.966406	-1.026	0.928999
1368548_at	-1.06596	0.73565	-1.18349	0.252605	-1.03593	0.878382
1368549_at	-1.01215	0.972631	-1.00573	0.988675	-1.07972	0.745231
1368550_at	1.12991	0.826978	1.24642	0.630006	1.43913	0.365103
1368551_at	-1.03365	0.912308	1.01541	0.963655	1.05088	0.855694
1368552_at	-1.06636	0.744512	-1.08252	0.66656	1.07429	0.704783
1368553_at	-1.05509	0.843278	-1.09274	0.698136	-1.1549	0.468583
1368554_at	1.15277	0.298028	1.2309	0.0994853	1.14869	0.310223
1368555_at	-1.15045	0.604299	-1.13677	0.645888	-1.24592	0.363386
1368556_at	-1.01907	0.936732	1.0369	0.861684	-1.02437	0.915298
1368557_s_at	1.11574	0.663248	1.16446	0.506451	1.22454	0.34659
1368558_s_at	-1.14646	0.628577	-1.22871	0.420833	-1.45411	0.0980227
1368559_at	-1.04909	0.852814	-1.15372	0.439025	-1.22653	0.232736
1368560_at	1.13929	0.674074	1.30394	0.306367	1.58513	0.0463509
1368561_at	1.49685	0.323887	1.33735	0.507141	1.33928	0.503888
1368562_at	1.10227	0.702964	1.02135	0.954339	1.01643	0.965823
1368563_at	-1.02072	0.971999	1.09358	0.839913	1.04809	0.927138
1368564_at	1.05989	0.638026	1.10993	0.331876	1.0829	0.481625
1368565_at	-1.29527	0.548217	-1.34874	0.469737	-1.38953	0.418008
1368566_a_at	1.00494	0.992775	-1.09454	0.779789	-1.04114	0.919128
1368567_at	-1.00804	0.991915	1.01126	0.988083	-1.00651	0.993501
1368568_at	-1.07058	0.74321	-1.00421	0.990806	-1.09675	0.62264
1368569_at	-1.06728	0.942645	1.0336	0.973228	1.045	0.962589
1368570_at	-1.02791	0.956319	-1.13771	0.714448	-1.22968	0.499452
1368571_at	-1.01711	0.971893	1.03757	0.931714	-1.00347	0.995669
1368572_a_at	1.09866	0.510187	1.16628	0.232421	1.0394	0.837709
1368573_at	1.0086	0.976615	1.00334	0.99221	1.01036	0.971374
1368574_at	1.09042	0.782681	-1.01048	0.982643	1.03009	0.941564
1368575_at	1.01117	0.969885	1.00965	0.974156	-1.02298	0.931081
1368576_at	1.11045	0.605674	1.14579	0.472926	1.05577	0.829362
1368577_at	-1.08603	0.569798	1.01085	0.963474	1.00684	0.978411
1368578_at	1.14685	0.296216	1.13078	0.357201	1.05401	0.755464
1368579_at	-1.06521	0.804564	-1.00728	0.985304	1.00464	0.991155
1368580_at	-1.01415	0.962419	-1.00027	0.999416	1.02865	0.916564
1368581_at	1.10394	0.744433	1.16586	0.562807	-1.0786	0.820462
1368582_at	-1.02502	0.937796	1.0175	0.957656	1.04114	0.888579
1368583_a_at	1.00369	0.994739	-1.07742	0.812054	-1.15905	0.556803
1368584_a_at	1.02019	0.970681	1.03805	0.939593	1.13149	0.731678
1368585_at	1.11038	0.697649	1.13816	0.606663	1.05629	0.870164
1368586_at	1.03484	0.903162	1.12621	0.536677	-1.05452	0.830726
1368587_at	1.01579	0.878109	-1.0128	0.905017	-1.01268	0.905842
1368588_at	-1.18578	0.538792	-1.20531	0.489869	-1.06925	0.857203
1368589_at	1.03443	0.95505	-1.19564	0.657815	-1.03147	0.958871
1368590_at	1.13127	0.728914	-1.03922	0.936991	1.05337	0.909119
1368591_at	-1.02584	0.947376	-1.03945	0.914231	-1.05273	0.88007
1368592_at	1.0591	0.887933	1.11472	0.744874	1.16726	0.602027
1368593_at	1.23102	0.653027	-1.07278	0.911762	-1.02205	0.976745
1368594_at	1.09694	0.641172	1.01525	0.960551	1.0926	0.659504
1368595_at	-1.05279	0.893387	-1.10977	0.734464	-1.06587	0.860277
1368596_at	-1.0767	0.848077	-1.02513	0.957469	1.0656	0.874833
1368597_at	-1.03196	0.908866	1.05202	0.835488	1.03629	0.894687
1368598_at	-1.02872	0.934086	1.01046	0.978934	-1.02884	0.933721
1368599_at	1.03215	0.920213	1.1238	0.592015	-1.02192	0.948527
1368600_at	1.16328	0.609095	1.31943	0.28372	1.60334	0.0430099
1368601_at	1.0514	0.799417	1.07919	0.656328	1.02211	0.928019
1368602_at	1.00672	0.971057	1.05789	0.615079	1.04158	0.742397
1368603_at	1.08032	0.939423	-1.09202	0.929588	-1.16486	0.863048
1368604_at	1.01362	0.973034	-1.00937	0.982643	-1.13906	0.582942
1368605_at	1.00764	0.980254	1.04558	0.844756	1.02937	0.908388
1368606_at	1.06791	0.625697	1.1641	0.169653	1.01863	0.923389
1368607_at	-1.12997	0.952884	2.69634	0.416487	2.73939	0.405247
1368608_at	1.07617	0.769362	1.12875	0.569038	1.0811	0.749405
1368609_at	-1.01588	0.960736	-1.0334	0.908451	-1.09	0.688481
1368610_at	-1.17307	0.759339	-1.13631	0.821646	-1.12881	0.831652
1368611_at	-1.05322	0.818945	1.03809	0.881057	1.04195	0.865062
1368612_at	1.08459	0.756619	1.16215	0.487971	1.04382	0.892591
1368613_at	1.03843	0.884988	1.02435	0.933024	-1.07861	0.716606
1368614_at	-1.06218	0.858235	-1.07648	0.816979	-1.12244	0.670031
1368615_a_at	1.1654	0.21182	1.1424	0.293965	1.1973	0.127351
1368616_at	1.12529	0.503758	1.05186	0.826915	1.14168	0.43922
1368617_at	1.10188	0.808579	1.03709	0.94209	1.20618	0.562479
1368618_at	1.05124	0.915879	-1.01629	0.976789	1.01128	0.985539
1368619_at	1.05426	0.828637	-1.00292	0.994223	-1.0017	0.996908
1368620_at	1.14491	0.69366	1.00884	0.988435	1.00248	0.997588
1368621_at	1.05959	0.77979	-1.08493	0.658519	-1.04519	0.844473
1368622_at	1.0204	0.971341	1.00215	0.997901	-1.16442	0.664853
1368623_at	1.02292	0.924515	1.05264	0.792572	1.01779	0.943394
1368624_at	1.03926	0.871182	1.21618	0.188697	1.02277	0.932085
1368625_at	-1.13596	0.835946	-1.12484	0.85268	-1.22823	0.694349
1368626_at	1.02346	0.927746	1.0816	0.665188	1.01516	0.955321
1368627_at	-1.05574	0.876975	-1.21691	0.40644	-1.3053	0.228374
1368628_at	1.03839	0.836533	1.05385	0.748718	1.05693	0.729281
1368629_at	1.11624	0.52901	1.1317	0.465298	1.05909	0.78839
1368630_at	1.12896	0.636183	1.20497	0.418713	1.11802	0.670876
1368631_at	1.00262	0.995905	-1.06082	0.835754	-1.02393	0.945456
1368632_at	1.127	0.76551	1.01271	0.984141	1.06774	0.891398
1368633_at	1.0667	0.728849	1.10698	0.53246	1.12449	0.453618
1368634_at	-1.00238	0.992188	1.08332	0.486516	-1.01303	0.944448
1368635_at	1.16877	0.507315	-1.00622	0.989649	1.05703	0.864702
1368636_at	1.08547	0.601984	1.06474	0.714448	1.05095	0.78863
1368637_at	1.06989	0.845905	1.04088	0.918583	-1.07071	0.843116
1368638_at	1.03365	0.861209	1.1299	0.342084	-1.00857	0.971803
1368639_at	-1.03654	0.790777	1.02495	0.87197	-1.03303	0.81619
1368640_at	1.01632	0.941402	1.19294	0.142301	1.0873	0.555531
1368641_at	1.01484	0.975148	1.01859	0.967872	1.15605	0.604687
1368642_at	-1.00008	0.999952	-1.24163	0.625573	-1.25954	0.595696
1368643_at	-1.0015	0.998155	-1.00652	0.989872	-1.01615	0.970929
1368644_at	1.08409	0.76764	1.11099	0.674174	1.13031	0.605674
1368645_at	1.09028	0.764406	-1.15856	0.546948	-1.09988	0.731259
1368646_at	1.03667	0.940119	1.02804	0.955321	-1.04301	0.928132
1368647_at	-1.03219	0.922468	-1.15882	0.485967	-1.11705	0.627027
1368648_at	-1.07146	0.822775	1.01937	0.9613	-1.02312	0.952831
1368649_at	1.06326	0.885071	-1.06927	0.872574	1.09353	0.813773
1368650_at	1.16121	0.802094	1.02608	0.975442	1.02058	0.981039
1368651_at	1.2079	0.476999	-1.17977	0.549679	-1.37963	0.17407
1368652_at	1.01808	0.905166	1.03994	0.74191	1.03901	0.748656
1368653_a_at	-1.02314	0.922763	-1.0025	0.993939	1.07564	0.668019
1368654_at	-1.13977	0.449094	-1.15983	0.377106	-1.01062	0.972851
1368655_at	1.03781	0.95602	-1.02113	0.977054	-1.26167	0.585549
1368656_at	1.06545	0.78626	1.00321	0.993563	1.02045	0.946833
1368657_at	1.09363	0.548206	1.17972	0.204404	1.04597	0.808306
1368658_at	-1.18317	0.536306	-1.30724	0.274858	-1.02052	0.963655
1368659_at	-1.02056	0.964109	-1.11925	0.716105	-1.10083	0.768545
1368660_at	1.14224	0.303279	1.10166	0.482462	1.04756	0.78839
1368661_at	1.10805	0.692773	1.09868	0.724414	-1.01999	0.958249
1368662_at	1.10549	0.559329	1.11129	0.532097	1.06341	0.757667
1368663_at	1.02429	0.925284	1.01884	0.944428	1.00702	0.981967
1368664_at	1.04555	0.913205	-1.02478	0.956319	-1.01048	0.983965
1368665_at	-1.08063	0.666777	1.01755	0.947385	1.00485	0.988043
1368666_a_at	1.05799	0.750123	1.04551	0.817418	1.18606	0.198242
1368667_at	-1.01702	0.963653	1.10305	0.693642	1.10716	0.677994
1368668_at	-1.0535	0.768998	1.01547	0.948258	1.17824	0.210065
1368669_at	-1.07212	0.93053	-1.14608	0.841595	-1.27991	0.658404
1368670_a_at	-1.04443	0.870191	1.10683	0.611953	1.08984	0.682186
1368671_at	1.29131	0.40742	1.05714	0.907469	1.20132	0.581451
1368672_at	-1.0077	0.979683	1.17278	0.296753	1.05548	0.792827
1368673_at	1.04682	0.804841	1.05934	0.734126	1.15413	0.286974
1368674_at	1.04548	0.793866	-1.02391	0.907171	1.06593	0.669926
1368675_at	1.09048	0.682186	1.12726	0.534671	1.18227	0.347285
1368676_at	-1.01517	0.966238	1.04194	0.893185	1.09124	0.716494
1368677_at	1.04573	0.870336	1.10658	0.626218	1.08059	0.731581
1368678_at	1.0181	0.952702	1.02963	0.916521	-1.03019	0.914493
1368679_a_at	-1.02077	0.953298	-1.06978	0.804521	-1.17585	0.436294
1368680_a_at	1.05274	0.784676	1.16267	0.283019	1.0313	0.887933
1368681_at	1.12569	0.442211	1.11168	0.503209	1.14472	0.364293
1368682_at	1.05187	0.890757	1.01105	0.981115	1.07398	0.830726
1368683_at	-1.04735	0.900472	-1.14964	0.596367	-1.1833	0.499905
1368684_at	1.04587	0.90666	1.15082	0.60409	1.12073	0.693007
1368685_at	1.0615	0.769362	1.10453	0.565053	-1.04288	0.853676
1368686_at	1.00984	0.937296	-1.02763	0.777985	-1.0599	0.447856
1368687_at	1.011	0.979958	1.00026	0.999416	1.02187	0.956052
1368688_at	-1.00789	0.97792	1.02819	0.906602	1.03235	0.889635
1368689_at	1.06984	0.821886	1.18173	0.458485	1.00611	0.989591
1368690_a_at	1.02971	0.898278	1.00584	0.984519	1.0893	0.600541
1368691_at	-1.03535	0.872514	1.02577	0.9119	-1.03632	0.867483
1368692_a_at	1.0599	0.876114	1.14346	0.635017	1.12516	0.687802
1368693_at	1.04329	0.932085	-1.26929	0.437741	-1.32618	0.340229
1368694_at	-1.01335	0.960722	-1.00027	0.999416	-1.06168	0.756619
1368695_at	-1.01697	0.955965	-1.15216	0.431441	-1.17449	0.356294
1368696_at	1.01166	0.975567	-1.04968	0.871749	-1.06224	0.828427
1368697_at	-1.01885	0.942874	1.04259	0.851485	1.01603	0.952503
1368698_at	1.04467	0.927746	-1.12327	0.753798	-1.08584	0.842575
1368699_at	1.00014	0.999512	1.01734	0.948303	1.06585	0.739662
1368700_at	-1.00158	0.99836	-1.1868	0.593007	-1.11108	0.778922
1368701_at	-1.0373	0.91399	-1.06072	0.846183	-1.01178	0.976623
1368702_at	-1.05035	0.86258	-1.03253	0.917807	-1.05326	0.851753
1368703_at	1.09706	0.836618	1.14546	0.731046	1.35167	0.345208
1368704_a_at	-1.08023	0.755345	-1.00897	0.981163	-1.00974	0.979437
1368705_at	1.15467	0.668177	1.08199	0.848672	1.16486	0.642803
1368706_at	-1.00606	0.985304	-1.17992	0.28446	-1.20708	0.210051
1368707_at	-1.06742	0.632094	-1.0866	0.515054	-1.10669	0.404088
1368708_a_at	1.15744	0.308961	1.11181	0.491294	1.06918	0.702138
1368709_at	1.15289	0.758836	1.01971	0.977279	1.01079	0.989045
1368710_at	1.02001	0.935043	-1.05402	0.782369	-1.03863	0.857163
1368711_at	-1.04412	0.937368	1.11464	0.805762	1.31315	0.415961
1368712_at	-1.02079	0.961822	-1.06538	0.856685	-1.09686	0.76468
1368713_at	1.03117	0.922916	1.10511	0.661296	1.00501	0.990616
1368714_at	1.02644	0.914199	1.06693	0.729329	1.02814	0.907773
1368715_s_at	1.03785	0.921826	1.16653	0.54546	1.1609	0.561053
1368716_at	1.10813	0.529359	1.04885	0.819698	1.0752	0.687105
1368717_at	1.11199	0.625909	-1.15963	0.458407	-1.1335	0.547611
1368718_at	1.00108	0.99839	1.12801	0.598775	1.28864	0.187966
1368719_at	-1.03466	0.899545	-1.04647	0.855647	-1.1724	0.355526
1368720_at	1.31174	0.719774	1.00214	0.999239	-1.22006	0.812533
1368721_at	1.04606	0.804357	-1.00396	0.989199	1.04882	0.78839
1368722_at	1.02019	0.921332	1.07732	0.594954	1.11519	0.390314
1368723_at	-1.06028	0.889201	-1.02559	0.957656	-1.11913	0.742195
1368724_a_at	2.58915	0.528321	1.27958	0.911957	1.48371	0.842714
1368725_at	-1.2502	0.35307	-1.09584	0.767289	-1.04575	0.90656
1368726_a_at	-1.07553	0.700646	-1.06159	0.768465	-1.18469	0.268335
1368727_at	1.02821	0.927447	1.04327	0.880167	1.06825	0.7867
1368728_at	-1.23989	0.429266	-1.28464	0.340205	-1.26585	0.373017
1368729_a_at	1.09935	0.423203	1.08954	0.475627	1.04316	0.777333
1368730_a_at	1.05379	0.884854	1.08365	0.80141	-1.01907	0.964363
1368731_at	-1.87608	0.494965	-1.3257	0.812192	-1.27469	0.844964
1368732_at	-1.21263	0.521756	-1.10701	0.782022	1.02791	0.95456
1368733_at	1.032	0.950935	1.2156	0.543363	1.27764	0.420833
1368734_at	1.18464	0.719416	1.14761	0.78626	-1.05478	0.933991
1368735_a_at	-1.06437	0.765944	-1.05694	0.800652	-1.09783	0.610483
1368736_at	-1.18186	0.798084	1.15974	0.827048	1.39598	0.523818
1368737_at	1.00834	0.972903	1.05347	0.754551	1.05207	0.762037
1368738_at	1.06458	0.716105	1.09004	0.580342	1.07323	0.667767
1368739_s_at	1.01237	0.963501	-1.0005	0.999346	-1.06109	0.757329
1368740_at	-1.05786	0.829155	1.09275	0.691533	-1.09134	0.695796
1368741_at	-1.24207	0.585608	-1.17177	0.71757	-1.34637	0.418863
1368742_at	1.01315	0.977348	-1.16318	0.574431	-1.23776	0.388587
1368743_a_at	1.00792	0.979774	-1.0344	0.890685	-1.06592	0.751906
1368744_a_at	-1.00043	0.999416	1.08509	0.604421	1.06056	0.73608
1368745_at	1.00669	0.984507	1.16	0.380039	1.06734	0.759622
1368746_a_at	1.0771	0.629705	1.14197	0.320837	1.00939	0.970324
1368747_at	-1.02151	0.961587	1.08	0.822775	1.1994	0.484521
1368748_at	1.11451	0.573515	1.08033	0.718524	1.00911	0.978279
1368749_at	-1.00167	0.995964	1.10156	0.49701	1.04805	0.791952
1368750_a_at	1.04918	0.903159	1.07731	0.830841	-1.01503	0.974385
1368751_at	-1.05244	0.909497	1.08294	0.844022	1.00425	0.99517
1368752_at	1.14152	0.282648	1.06042	0.69659	1.10407	0.445671
1368753_at	-1.02091	0.970529	-1.06837	0.885795	1.16037	0.675343
1368754_at	1.00995	0.972829	1.03226	0.895331	-1.02066	0.937591
1368755_at	-1.01723	0.974101	-1.08015	0.848672	-1.26981	0.401751
1368756_at	1.04944	0.724414	1.04368	0.764923	-1.01974	0.91206
1368757_at	1.01222	0.973686	1.10179	0.677648	1.09023	0.720825
1368758_a_at	1.10417	0.582337	1.0345	0.893185	1.09622	0.616891
1368759_at	1.24484	0.290872	1.25387	0.270143	1.18537	0.433901
1368760_at	1.09848	0.740971	1.01918	0.962412	1.01565	0.970639
1368761_at	-1.08716	0.591246	-1.03071	0.887678	-1.15603	0.291251
1368762_at	-1.06561	0.93886	-1.21486	0.755239	1.02284	0.981039
1368763_at	1.07941	0.655737	1.08845	0.608	-1.01583	0.950647
1368764_at	-1.11202	0.625715	-1.01665	0.961373	1.0103	0.977282
1368765_at	1.1501	0.467735	1.22892	0.244393	1.08729	0.706334
1368766_at	1.07166	0.7867	1.11795	0.608	1.03595	0.908065
1368767_at	1.12192	0.467747	1.08578	0.634858	1.01783	0.945401
1368768_at	1.0727	0.673329	1.14125	0.349575	1.08776	0.591752
1368769_at	-1.03805	0.923444	1.11368	0.711849	1.24871	0.35307
1368770_at	-1.26748	0.504111	-1.17602	0.681935	-1.39572	0.310959
1368771_at	1.04798	0.884667	-1.00932	0.982595	1.127	0.616932
1368772_at	-1.07181	0.831877	-1.02037	0.961356	1.0462	0.90246
1368773_at	1.0612	0.90776	-1.10724	0.819918	1.00949	0.989199
1368774_a_at	1.04824	0.854662	1.09065	0.679429	1.03411	0.904867
1368775_at	-1.19377	0.297683	-1.1763	0.34659	-1.12891	0.508078
1368776_at	1.06969	0.883279	-1.13493	0.736079	-1.05538	0.909941
1368777_at	1.01064	0.967657	1.02183	0.926993	-1.04853	0.805847
1368778_at	-1.35891	0.575029	-1.47132	0.455206	-1.39437	0.535085
1368779_a_at	1.20736	0.653475	1.11186	0.834531	1.01858	0.978875
1368780_at	1.12573	0.212505	1.10239	0.325664	1.14517	0.142301
1368781_at	-1.01278	0.97921	-1.08328	0.819141	-1.07267	0.846459
1368782_at	-1.03786	0.901631	-1.02275	0.944936	-1.00933	0.979912
1368783_at	-1.05981	0.798339	-1.03644	0.890902	-1.08587	0.68067
1368784_at	-1.06493	0.854662	1.13	0.658519	1.07527	0.825233
1368785_a_at	-1.13897	0.857163	-1.14454	0.850804	-1.03078	0.973778
1368786_a_at	1.04621	0.798182	1.01105	0.962419	1.06087	0.711988
1368787_at	1.06778	0.743674	1.05277	0.814251	-1.10754	0.559626
1368788_at	1.09027	0.507603	1.0174	0.933024	1.06968	0.628691
1368789_at	-1.17465	0.743256	-1.25354	0.607104	-1.18296	0.727603
1368790_at	-1.04748	0.905382	1.14594	0.626358	1.06864	0.851753
1368791_at	1.04622	0.87148	1.04106	0.887965	1.02816	0.927874
1368792_at	1.0051	0.99204	-1.03195	0.934684	1.08704	0.780642
1368793_at	1.02994	0.914031	1.11646	0.555819	1.14385	0.447863
1368794_at	1.11967	0.591718	1.09701	0.679069	1.1099	0.62692
1368795_at	1.14796	0.445253	1.19859	0.291693	1.10907	0.59335
1368796_at	-1.01597	0.948619	1.05908	0.750309	1.0107	0.96702
1368797_at	-1.1871	0.576535	-1.16368	0.634163	-1.20284	0.539294
1368798_at	-1.02198	0.925844	1.05306	0.782972	1.00821	0.97562
1368799_at	-1.2097	0.591505	-1.19638	0.618446	-1.01152	0.986562
1368800_at	1.01575	0.938417	1.00647	0.977279	1.03898	0.815143
1368801_at	1.0351	0.892168	1.17983	0.308961	1.1146	0.543311
1368802_at	1.02089	0.939615	1.04244	0.861124	-1.02036	0.941185
1368803_at	1.02252	0.931952	1.08452	0.654053	-1.02287	0.930418
1368804_at	1.03922	0.870036	1.04862	0.828446	1.0314	0.899985
1368805_at	-1.0362	0.905196	1.10277	0.655973	-1.00748	0.984576
1368806_at	-1.07533	0.386992	-1.03354	0.753798	-1.0649	0.467154
1368807_at	-1.00771	0.983732	-1.01107	0.975078	-1.00475	0.99071
1368808_at	-1.05285	0.885695	-1.08563	0.792109	-1.14949	0.593138
1368809_at	-1.00202	0.995964	-1.05529	0.804579	-1.10123	0.589406
1368810_a_at	1.32642	0.536657	1.00093	0.999416	1.09962	0.882155
1368811_at	-1.02626	0.935413	-1.03707	0.90397	1.06185	0.818989
1368812_at	-1.01623	0.961356	1.00588	0.988128	-1.02607	0.934317
1368813_at	1.07798	0.833904	-1.14166	0.655876	-1.24473	0.39784
1368814_at	-1.01849	0.977217	-1.05511	0.922169	-1.17003	0.699689
1368815_at	1.16858	0.648484	1.01593	0.977303	-1.02395	0.96399
1368816_at	1.62706	0.608	-1.12629	0.933024	-1.0275	0.987818
1368817_at	-1.00556	0.988128	-1.06095	0.805634	1.00373	0.992497
1368818_at	1.02387	0.953217	-1.08064	0.803342	1.11478	0.693046
1368819_at	1.04978	0.776251	-1.02534	0.904019	1.02447	0.90716
1368820_at	1.0598	0.875669	1.04097	0.919132	-1.08592	0.803295
1368821_at	1.12872	0.709068	-1.00254	0.997051	1.14086	0.675498
1368822_at	1.09419	0.793073	1.02263	0.960973	1.15463	0.622066
1368823_at	1.06468	0.698986	1.01608	0.944741	1.08836	0.566409
1368824_at	1.1053	0.911989	-1.31419	0.686558	1.06857	0.94544
1368825_at	1.02167	0.897091	1.0882	0.442305	1.01037	0.955353
1368826_at	-1.05401	0.887316	1.01683	0.970481	-1.00382	0.994791
1368827_at	-1.00682	0.98833	-1.03077	0.934653	-1.03311	0.928511
1368828_at	-1.00158	0.997676	1.11415	0.600849	1.03577	0.904095
1368829_at	1.0455	0.932736	-1.06339	0.901145	-1.02742	0.961356
1368830_at	1.00527	0.987281	1.00749	0.980246	-1.03943	0.866834
1368831_at	-1.0095	0.956591	-1.06851	0.545029	-1.01525	0.927138
1368832_at	-1.04433	0.905226	-1.01998	0.961542	-1.06115	0.859857
1368833_at	1.10989	0.497886	1.00505	0.986906	1.07379	0.676555
1368834_at	1.04028	0.907098	-1.06192	0.843585	-1.1232	0.633251
1368835_at	-1.10094	0.65719	-1.05804	0.827521	-1.08693	0.712003
1368836_a_at	-1.03759	0.840675	-1.02812	0.889018	-1.00921	0.96936
1368837_at	1.03608	0.84031	1.01635	0.938431	-1.02274	0.908596
1368838_at	1.11614	0.775375	1.00239	0.997768	-1.11601	0.774797
1368839_at	1.18002	0.355606	1.13197	0.518017	1.12455	0.54546
1368840_at	-1.11979	0.822775	-1.02343	0.972891	-1.1619	0.741741
1368841_at	1.08974	0.835527	-1.11748	0.770948	-1.00411	0.995544
1368842_at	1.02394	0.950663	-1.13928	0.598244	-1.09871	0.730193
1368843_at	-1.13107	0.495465	-1.06255	0.787906	-1.04493	0.85988
1368844_at	-1.1019	0.70207	-1.17371	0.466963	-1.03629	0.91575
1368845_at	1.00335	0.991214	-1.02141	0.926962	-1.01162	0.962762
1368846_at	1.05635	0.807222	1.08838	0.661363	-1.01785	0.950642
1368847_at	-1.05545	0.878495	-1.01759	0.966919	-1.12817	0.65557
1368848_at	-1.02373	0.957477	1.0132	0.978319	-1.03402	0.937289
1368849_at	-1.02883	0.920899	-1.09417	0.663193	-1.00954	0.977279
1368850_at	1.14975	0.389184	1.14681	0.399616	1.06216	0.769709
1368851_at	-1.00214	0.995669	-1.05323	0.809111	-1.0843	0.660274
1368852_at	-1.05271	0.781553	-1.00169	0.99613	1.01563	0.948914
1368853_at	1.08249	0.56524	1.11763	0.381774	1.13125	0.320814
1368854_at	1.08166	0.692145	1.04079	0.872166	1.19002	0.28446
1368855_at	-1.10322	0.626905	-1.15128	0.444694	-1.08012	0.723316
1368856_at	-1.01558	0.962762	-1.06152	0.816439	-1.20284	0.316622
1368857_at	1.01675	0.926993	1.04226	0.771468	1.07852	0.522527
1368858_at	-1.03731	0.908451	-1.00765	0.985745	-1.18096	0.421996
1368859_at	1.04909	0.863823	1.05275	0.85097	1.0274	0.931774
1368860_at	1.05446	0.716105	1.03413	0.843732	1.05724	0.69677
1368861_a_at	1.10331	0.764187	1.07222	0.849856	1.02075	0.963838
1368862_at	1.0261	0.937096	1.00683	0.986895	-1.17477	0.418713
1368863_at	-1.00708	0.985862	-1.01274	0.971047	-1.02593	0.934777
1368864_at	1.03324	0.838743	1.03956	0.79941	1.00237	0.992503
1368865_at	-1.00457	0.987019	1.08206	0.595894	1.03253	0.872403
1368866_at	-1.06836	0.900464	-1.15944	0.720342	1.00324	0.996937
1368867_at	-1.07679	0.937207	-1.2529	0.748512	1.0251	0.981967
1368868_at	1.12144	0.591246	1.06921	0.79271	1.09302	0.698551
1368869_at	1.19141	0.563506	1.18447	0.578986	1.28356	0.367014
1368870_at	-1.16024	0.759083	-1.2241	0.644913	-1.15228	0.77341
1368871_at	-1.04162	0.851035	-1.06616	0.730072	-1.10131	0.556416
1368872_a_at	-1.09103	0.791743	-1.11202	0.729131	1.02458	0.955017
1368873_at	1.12412	0.676431	1.0809	0.809608	-1.09344	0.770948
1368874_a_at	-1.04532	0.909087	-1.01536	0.973228	-1.18053	0.528982
1368875_a_at	1.08767	0.694328	1.094	0.667767	-1.02102	0.945527
1368876_a_at	1.10974	0.640127	1.11198	0.631923	1.09214	0.706405
1368877_at	1.10813	0.667767	1.06489	0.824298	1.13899	0.560748
1368878_at	1.07074	0.920146	1.05559	0.939479	1.35044	0.501646
1368879_a_at	1.02802	0.840772	1.12353	0.206404	1.07494	0.475341
1368880_at	-1.00613	0.988894	1.06617	0.820176	1.08251	0.760147
1368881_at	-1.06359	0.798182	-1.01098	0.974197	-1.02018	0.948308
1368882_at	1.17976	0.554744	1.19238	0.522278	1.05521	0.891132
1368883_at	1.0695	0.843116	1.00452	0.993303	1.10175	0.745388
1368884_at	1.07175	0.660882	1.1202	0.41455	1.07347	0.651446
1368885_at	1.04861	0.897316	-1.1411	0.620158	-1.11815	0.691062
1368886_at	-1.02442	0.953298	-1.01059	0.981967	-1.22579	0.396118
1368887_at	1.125	0.822775	-1.06552	0.917055	1.04861	0.940937
1368888_a_at	-1.07945	0.803235	-1.1471	0.58622	-1.14983	0.576526
1368889_at	1.13448	0.591753	1.0483	0.883234	-1.00929	0.982487
1368890_at	1.02958	0.921265	1.06641	0.791132	1.05924	0.819141
1368891_at	1.07203	0.743256	1.1414	0.452302	1.12783	0.503209
1368892_at	1.07673	0.536306	1.12356	0.282661	1.04955	0.720728
1368893_at	1.02245	0.974382	1.01632	0.982521	-1.0894	0.878223
1368894_at	1.38112	0.674843	1.12151	0.912088	-1.01762	0.990229
1368895_at	-1.03506	0.859091	-1.00563	0.983207	-1.06363	0.698551
1368896_at	-1.04512	0.915301	-1.07038	0.856513	-1.04916	0.906599
1368897_at	1.00939	0.985146	1.12533	0.678948	1.08197	0.809556
1368898_at	-1.06626	0.747991	-1.08125	0.675902	-1.13884	0.425037
1368899_at	-1.03074	0.917055	1.01075	0.974964	1.08509	0.709209
1368900_at	-1.00404	0.992147	1.05693	0.82886	1.07836	0.74253
1368901_at	-1.02906	0.951353	1.08553	0.827447	-1.0518	0.905973
1368902_at	1.15957	0.60409	1.08079	0.826691	1.0855	0.813193
1368903_at	1.00925	0.968159	1.05999	0.701123	1.09369	0.502911
1368904_at	1.03224	0.877796	-1.01973	0.931619	1.01708	0.941195
1368905_at	-1.06854	0.931543	2.14937	0.0652801	3.294	0.00224542
1368906_at	-1.04305	0.878883	-1.02562	0.934152	-1.04833	0.859714
1368907_at	1.01141	0.977493	1.17282	0.47537	1.18952	0.430562
1368908_at	1.05081	0.874925	1.09166	0.734459	1.10328	0.69314
1368909_a_at	-1.05657	0.800067	-1.12233	0.502394	-1.01772	0.949643
1368910_at	1.07483	0.854662	1.02416	0.960439	1.02193	0.96422
1368911_at	-1.10986	0.763485	-1.20895	0.509201	-1.15091	0.653027
1368912_at	-1.07556	0.815503	1.01551	0.971057	-1.07443	0.818736
1368913_at	1.06697	0.690898	1.00734	0.977282	1.10542	0.483685
1368914_at	1.01019	0.986216	-1.13175	0.70969	-1.24914	0.430917
1368915_at	1.11174	0.841691	1.09479	0.87148	1.09394	0.872166
1368916_at	-1.0778	0.843155	-1.35792	0.229695	-1.50802	0.0874659
1368917_at	1.10183	0.671988	1.06476	0.813523	1.10075	0.675345
1368918_at	1.06845	0.775683	1.10769	0.610175	1.11294	0.588949
1368919_at	1.0895	0.742195	1.19627	0.397121	1.10953	0.669523
1368920_at	1.11375	0.714448	1.02714	0.948671	1.04508	0.907859
1368921_a_at	1.07738	0.79331	-1.0766	0.796163	-1.06595	0.830486
1368922_at	1.09689	0.486307	1.13052	0.327654	1.0216	0.915673
1368923_at	1.02624	0.923393	1.09027	0.653892	1.10916	0.568072
1368924_at	-1.02668	0.970887	-1.04714	0.944075	-1.27499	0.565041
1368925_a_at	-1.00218	0.99619	1.18529	0.366148	-1.00219	0.996155
1368926_at	1.01539	0.954025	1.09657	0.584579	-1.02858	0.906651
1368927_at	-1.01601	0.962971	1.00081	0.998814	-1.09224	0.704913
1368928_at	-1.17554	0.608	-1.07504	0.860767	-1.084	0.838609
1368929_at	-1.02353	0.948203	1.06138	0.839688	-1.04215	0.898934
1368930_at	-1.01397	0.993303	-1.13927	0.910367	-1.21903	0.851299
1368931_at	-1.02566	0.911762	-1.04983	0.800994	-1.13975	0.363186
1368932_at	-1.09258	0.80419	-1.13451	0.688956	-1.22497	0.460754
1368933_at	1.0097	0.980133	-1.04185	0.895181	1.05593	0.850632
1368934_at	-1.11113	0.82241	-1.20157	0.635531	1.09936	0.844047
1368935_at	1.01484	0.958713	1.07002	0.740317	1.04092	0.868968
1368936_at	-1.0475	0.749536	1.12993	0.278592	1.2068	0.0700731
1368937_at	-1.08189	0.822775	1.01763	0.970417	-1.03355	0.938505
1368938_at	-1.13533	0.555139	-1.02832	0.932379	-1.20116	0.350405
1368939_a_at	1.06899	0.761741	1.11474	0.564708	1.13719	0.474245
1368940_at	-1.12382	0.872166	1.07203	0.931543	1.24817	0.703084
1368941_at	1.16167	0.343676	1.17394	0.303715	1.26027	0.109037
1368942_at	1.11052	0.655824	1.06388	0.825396	-1.04072	0.899545
1368943_at	1.02	0.966703	-1.23724	0.433554	-1.69973	0.0180313
1368944_at	1.02869	0.949626	-1.03824	0.931066	-1.17988	0.56172
1368945_at	1.03576	0.96586	-1.13475	0.84665	1.05295	0.947376
1368946_at	-1.06987	0.867725	-1.11003	0.765896	-1.12819	0.717333
1368947_at	1.18068	0.756838	1.19792	0.72793	1.31428	0.551046
1368948_at	1.07661	0.88548	-1.02764	0.963618	-1.25965	0.521945
1368949_at	-1.05028	0.864194	-1.11097	0.636563	-1.07484	0.775004
1368950_a_at	1.12969	0.418857	1.135	0.395272	1.12319	0.443274
1368951_at	1.09056	0.430902	1.02567	0.874592	1.08933	0.436294
1368952_at	1.04548	0.848091	-1.0073	0.981655	1.06696	0.74988
1368953_at	-1.00185	0.997353	-1.05665	0.852159	1.09172	0.727591
1368954_at	-1.04957	0.835488	-1.03022	0.909616	-1.13509	0.46375
1368955_at	1.06171	0.778172	1.06612	0.757667	1.05257	0.819131
1368956_at	1.1175	0.370405	1.08425	0.546294	1.04651	0.777014
1368957_at	1.2075	0.102777	1.16993	0.188529	1.1472	0.264132
1368958_at	-1.09676	0.735564	1.10407	0.711927	1.24289	0.316622
1368959_at	1.11203	0.509284	1.19415	0.218833	1.09729	0.576358
1368960_at	-1.00472	0.989786	1.11763	0.545029	1.11196	0.566255
1368961_at	-1.02615	0.938573	-1.02186	0.949411	1.00457	0.991652
1368962_at	1.06724	0.805174	1.08915	0.721961	1.0441	0.884302
1368963_at	1.07304	0.793122	1.04167	0.896991	-1.06441	0.823459
1368964_at	1.065	0.919932	-1.01732	0.982134	1.02246	0.975601
1368965_at	1.04614	0.899127	-1.00247	0.996553	-1.01585	0.970281
1368966_at	1.19528	0.232521	1.15633	0.351382	1.08555	0.648211
1368967_at	1.00895	0.98075	1.07003	0.787531	1.11977	0.591752
1368968_at	-1.05317	0.821814	1.00028	0.999416	1.04649	0.848902
1368969_at	-1.00933	0.978279	1.16324	0.408392	1.0494	0.851586
1368970_at	-1.01589	0.961883	-1.02077	0.948722	1.02891	0.924855
1368971_a_at	-1.09405	0.811824	-1.00867	0.988128	1.02127	0.966238
1368972_at	1.05938	0.856859	1.12635	0.636499	1.18153	0.466963
1368973_at	-1.01742	0.947748	1.16078	0.327654	1.02463	0.921332
1368974_at	1.11252	0.597967	1.10558	0.62481	1.07711	0.742293
1368975_at	-1.01675	0.979774	-1.04722	0.934837	-1.21007	0.615079
1368976_at	1.0044	0.991915	1.05684	0.842252	-1.1591	0.468492
1368977_a_at	-1.05038	0.857163	1.20841	0.306367	1.34478	0.0808696
1368978_at	1.10292	0.707982	1.09309	0.741817	1.08642	0.764236
1368979_at	1.04919	0.862791	1.08207	0.736024	1.00135	0.997901
1368980_at	-1.04444	0.885351	1.00331	0.994215	1.03164	0.922212
1368981_at	-1.0337	0.857846	-1.00591	0.980912	1.03639	0.842762
1368982_at	1.02104	0.956618	-1.00571	0.990604	-1.02632	0.945187
1368983_at	-1.05437	0.809567	1.05249	0.818731	-1.03877	0.87619
1368984_at	-1.06994	0.892935	-1.14395	0.739662	-1.30292	0.428796
1368985_at	-1.01762	0.95456	-1.0247	0.934317	-1.0073	0.983672
1368986_at	1.00937	0.976837	-1.01774	0.952834	-1.02016	0.945197
1368987_at	1.09356	0.720573	1.10291	0.68622	1.13126	0.583874
1368988_at	1.56424	0.695575	1.22105	0.89232	1.13616	0.936534
1368989_at	-1.00389	0.993397	1.08098	0.775375	1.01648	0.965347
1368990_at	-1.0049	0.992497	1.17306	0.52326	1.13351	0.637025
1368991_at	1.08263	0.898963	1.02572	0.972851	1.12618	0.831123
1368992_a_at	-1.08683	0.691614	-1.06668	0.778483	1.05213	0.836533
1368993_at	1.10184	0.563254	1.13142	0.434903	1.05457	0.79331
1368994_a_at	1.08022	0.69366	1.01394	0.962045	-1.02724	0.919013
1368995_at	-1.02439	0.932379	1.00201	0.99613	-1.01022	0.974382
1368996_at	1.08288	0.657808	1.10488	0.554488	1.07423	0.698512
1368997_at	1.00419	0.992497	1.05827	0.841265	1.01411	0.969683
1368998_at	1.05861	0.724748	1.08877	0.554985	1.03267	0.869768
1368999_a_at	1.10789	0.610479	1.1403	0.485507	1.11363	0.586362
1369000_at	1.07678	0.662308	1.07574	0.66762	1.15612	0.310042
1369001_at	1.00241	0.995544	1.0067	0.98524	1.0171	0.955017
1369002_at	-1.29851	0.497142	-1.15805	0.748191	-1.43365	0.313578
1369003_at	1.06351	0.882889	-1.01131	0.983856	-1.19906	0.54162
1369004_at	1.06321	0.78626	1.17384	0.349525	1.14213	0.455005
1369005_at	-1.00159	0.997424	1.05915	0.813969	1.0541	0.832309
1369006_at	1.08786	0.709355	1.1872	0.358058	1.06591	0.797685
1369007_at	-1.02875	0.932379	-1.046	0.882076	1.04708	0.878709
1369008_a_at	-1.08525	0.770431	-1.08606	0.767692	1.02382	0.949627
1369009_at	-1.02253	0.923862	-1.04741	0.813126	1.01614	0.948203
1369010_at	-1.03073	0.953188	-1.09227	0.831123	-1.10352	0.804841
1369011_at	-1.0613	0.90666	1.07066	0.88988	1.00572	0.993671
1369012_at	-1.01805	0.984085	-1.09993	0.887843	1.06817	0.927534
1369013_a_at	1.07794	0.669394	1.08322	0.643246	1.17185	0.279327
1369014_at	-1.02699	0.938627	1.00667	0.987727	-1.08895	0.737797
1369015_at	1.02327	0.961822	1.09381	0.805551	1.09534	0.800994
1369016_at	1.0459	0.728914	1.16113	0.119767	1.0567	0.64945
1369017_at	1.18525	0.328835	1.17835	0.349085	1.23285	0.210065
1369018_at	1.09026	0.756679	-1.0861	0.770324	1.00348	0.994739
1369019_at	1.02989	0.913205	1.02775	0.920559	1.07654	0.723037
1369020_at	1.06362	0.766632	1.04179	0.863843	-1.01484	0.958249
1369021_at	1.06943	0.745334	1.01048	0.972903	1.00839	0.978934
1369022_at	1.04444	0.879226	1.17748	0.395558	1.05848	0.82886
1369023_at	-1.01797	0.958508	1.04476	0.883243	1.31057	0.134636
1369024_at	1.03087	0.899036	-1.02222	0.931619	-1.00798	0.978234
1369025_at	-1.08611	0.666784	1.06653	0.757667	1.02742	0.91818
1369026_at	-1.05489	0.851586	1.00343	0.993849	-1.05878	0.836742
1369027_at	1.03547	0.904742	1.17348	0.39046	1.03677	0.900217
1369028_at	1.01052	0.975078	1.16453	0.398086	1.07357	0.751385
1369029_at	-1.10558	0.63997	-1.05896	0.825402	1.08637	0.716105
1369030_at	1.69617	0.596253	2.0471	0.437741	1.18529	0.90403
1369031_at	-1.11848	0.765107	-1.16011	0.662922	-1.35685	0.286974
1369032_at	1.11993	0.764632	1.02715	0.958375	-1.00797	0.990122
1369033_at	-1.1117	0.423968	-1.06285	0.691905	-1.03891	0.831375
1369034_at	1.08833	0.694263	1.02609	0.931912	1.0449	0.87011
1369035_a_at	-1.07045	0.679945	-1.00443	0.987991	1.04143	0.835488
1369036_at	1.04352	0.896232	1.08956	0.744512	1.1832	0.436473
1369037_at	-1.02282	0.94868	-1.06595	0.820591	-1.07913	0.772122
1369038_at	1.04889	0.868538	1.02992	0.925884	-1.02906	0.928511
1369039_at	-1.03125	0.91492	-1.00013	0.999634	-1.12006	0.564708
1369040_at	1.02458	0.941554	-1.06527	0.812301	1.05505	0.848672
1369041_at	1.09536	0.566255	1.07055	0.693651	-1.00451	0.988128
1369042_at	1.04648	0.893083	-1.30023	0.205786	-1.09528	0.736107
1369043_at	1.07859	0.746233	1.10215	0.652213	1.10655	0.633112
1369044_a_at	-1.00727	0.992067	-1.07534	0.883865	-1.07947	0.877337
1369045_at	1.10542	0.570896	1.06303	0.768639	1.00842	0.978082
1369046_at	-1.09543	0.685191	1.11433	0.611311	1.00163	0.997622
1369047_at	1.03478	0.857846	1.02005	0.926345	1.04326	0.811964
1369048_at	1.06953	0.683992	1.14212	0.338334	1.09828	0.531256
1369049_at	-1.08593	0.657602	-1.12567	0.479629	-1.09551	0.610483
1369050_at	1.09095	0.911551	-1.26165	0.693642	-1.31788	0.619384
1369051_at	-1.08207	0.848758	-1.00708	0.991148	-1.07191	0.87148
1369052_at	-1.01316	0.984706	-1.12344	0.791132	-1.02669	0.964337
1369053_at	1.08444	0.659195	1.15363	0.366345	1.07898	0.683478
1369054_at	1.02112	0.956385	1.06328	0.84665	-1.05757	0.8638
1369055_at	1.0401	0.820462	1.06996	0.637302	1.1474	0.256244
1369056_at	-1.00595	0.98349	1.02874	0.898806	1.04957	0.799378
1369057_at	1.00415	0.993024	1.0042	0.992836	-1.16061	0.506819
1369058_at	1.04688	0.792586	1.05807	0.727116	1.06644	0.677026
1369059_at	1.00748	0.98955	-1.1167	0.73444	-1.25312	0.397277
1369060_a_at	-1.11231	0.520258	-1.10749	0.540623	1.00972	0.973034
1369061_at	-1.11661	0.698825	1.11569	0.701539	1.23738	0.371349
1369062_at	1.14627	0.340292	1.0959	0.561581	1.10467	0.516273
1369063_at	-1.08492	0.702288	1.04561	0.86453	1.1148	0.57683
1369064_a_at	1.05638	0.765107	1.06053	0.74321	1.00923	0.972439
1369065_a_at	1.06267	0.917055	-1.09524	0.865192	-1.11592	0.828067
1369066_at	1.01454	0.976403	-1.07655	0.840098	-1.13942	0.664085
1369067_at	1.06114	0.762037	1.07146	0.710325	-1.01883	0.942655
1369068_at	1.02035	0.963352	1.01405	0.976182	1.09538	0.776251
1369069_at	1.01545	0.963615	1.05372	0.846317	-1.06431	0.806447
1369070_at	-1.03448	0.851865	1.0541	0.73549	1.09985	0.468133
1369071_at	1.05653	0.770071	1.0732	0.682186	-1.02118	0.931113
1369072_at	-1.39197	0.450873	-1.09604	0.887016	-1.06039	0.933784
1369073_at	1.24209	0.362026	1.03889	0.920893	1.12877	0.660828
1369074_at	-1.08431	0.814492	-1.10253	0.762511	-1.04916	0.904019
1369075_a_at	1.05263	0.8167	1.14244	0.421877	1.12543	0.484004
1369076_at	-1.31138	0.196666	-1.10769	0.701543	-1.07849	0.799088
1369077_at	-1.03076	0.948495	-1.03964	0.932085	-1.25418	0.418713
1369078_at	-1.04067	0.892811	-1.0923	0.701237	-1.07914	0.752398
1369079_at	1.03967	0.86107	1.11464	0.499188	-1.002	0.995793
1369080_at	-1.00122	0.997901	1.04416	0.864194	1.10006	0.622069
1369081_at	-1.01407	0.974868	1.01278	0.977279	-1.06486	0.853835
1369082_at	1.02262	0.929712	1.00798	0.978234	1.01587	0.952653
1369083_at	1.09203	0.839632	1.1263	0.762677	1.05939	0.905449
1369084_a_at	1.02419	0.923284	1.07561	0.690053	-1.01549	0.95392
1369085_s_at	-1.05775	0.927746	1.08902	0.881182	1.18528	0.707829
1369086_a_at	-1.1369	0.504749	-1.14441	0.477125	-1.08409	0.713912
1369087_at	-1.04026	0.861401	1.00448	0.989282	-1.10862	0.533854
1369088_at	1.0538	0.875031	1.11172	0.687479	-1.02927	0.938168
1369089_at	-1.061	0.737538	1.07148	0.681524	-1.0627	0.72793
1369090_at	1.14764	0.257054	1.14215	0.279402	1.07058	0.63389
1369091_at	1.09054	0.731678	-1.03426	0.918739	-1.06194	0.833147
1369092_at	-1.11423	0.734627	-1.02471	0.956385	-1.15179	0.628965
1369093_at	-1.01034	0.980386	-1.11285	0.67532	-1.08838	0.757898
1369094_a_at	-1.00921	0.987792	1.1914	0.575655	1.0666	0.881135
1369095_at	-1.03203	0.925572	1.04222	0.898256	1.00271	0.995849
1369096_at	-1.01813	0.960832	1.12933	0.598244	-1.00998	0.980127
1369097_s_at	-1.02514	0.945924	-1.05557	0.864216	-1.08215	0.777448
1369098_at	1.09497	0.805634	1.07188	0.863095	1.00445	0.994437
1369099_at	-1.12976	0.793903	-1.11021	0.831317	-1.31514	0.451703
1369100_at	1.01687	0.958311	1.04518	0.872425	-1.01072	0.975393
1369101_at	-1.01942	0.953172	1.0664	0.798334	-1.01476	0.965347
1369102_at	1.03786	0.896641	-1.01643	0.959524	-1.01981	0.950516
1369103_at	-1.02598	0.958078	-1.31553	0.322339	-1.0354	0.941254
1369104_at	-1.08075	0.854849	-1.10977	0.78839	-1.07526	0.86731
1369105_a_at	-1.15451	0.675345	-1.10294	0.802487	-1.21828	0.527941
1369106_at	-1.03596	0.911435	-1.02658	0.938003	-1.02478	0.942441
1369107_at	-1.01189	0.964796	1.00924	0.973727	-1.022	0.930155
1369108_at	1.07689	0.787508	1.16754	0.477094	1.11621	0.646158
1369109_at	-1.03695	0.871856	-1.00727	0.980108	-1.04803	0.820894
1369110_x_at	-1.14798	0.630437	1.00211	0.997756	-1.20246	0.485923
1369111_at	1.00056	0.998794	-1.01469	0.947385	1.01476	0.947015
1369112_at	1.04091	0.848091	1.13724	0.381877	1.04954	0.805109
1369113_at	-1.02755	0.934307	1.01181	0.974612	-1.0208	0.951901
1369114_at	-1.02017	0.922438	-1.03098	0.872307	-1.05005	0.763213
1369115_at	-1.05234	0.950432	1.05567	0.9469	-1.29818	0.627767
1369116_a_at	-1.01851	0.954258	1.06388	0.801486	-1.0261	0.932907
1369117_at	-1.02523	0.953188	1.07001	0.845905	-1.06826	0.850804
1369118_a_at	1.10459	0.534836	1.03699	0.86993	1.03087	0.894759
1369119_a_at	1.08105	0.723316	1.20272	0.29649	1.11893	0.567205
1369120_a_at	1.09624	0.666784	1.07698	0.746144	1.04819	0.859714
1369121_at	1.09714	0.791842	1.13205	0.695647	1.05737	0.890833
1369122_at	-1.18029	0.471163	-1.05693	0.864536	-1.04339	0.90246
1369123_a_at	-1.00528	0.988758	-1.01496	0.961822	1.01459	0.962419
1369124_at	1.05694	0.794991	1.10546	0.567634	1.08001	0.684786
1369125_at	1.07144	0.696499	1.09689	0.567387	1.03675	0.869712
1369126_at	-1.05686	0.899639	-1.01526	0.977216	1.03856	0.935846
1369127_a_at	-1.07259	0.658633	1.13865	0.338625	1.0092	0.971057
1369128_at	-1.04454	0.891629	-1.08842	0.745212	-1.14515	0.548169
1369129_at	1.05213	0.835488	-1.04996	0.844617	-1.0831	0.702821
1369130_at	1.03487	0.911228	1.04454	0.882155	-1.08484	0.733357
1369131_at	1.13393	0.525876	1.09656	0.669437	1.06933	0.780731
1369132_at	1.02395	0.947825	1.15622	0.521316	1.11845	0.643431
1369133_a_at	-1.01449	0.957468	1.07316	0.707508	1.06434	0.750324
1369134_x_at	1.08558	0.552253	1.14479	0.272482	1.07232	0.626253
1369135_at	1.07517	0.794235	1.13402	0.587379	1.02281	0.949962
1369136_at	-1.17829	0.868747	5.32688	0.00653739	7.16639	0.000743824
1369137_at	1.16706	0.303279	1.15078	0.358058	1.12352	0.462997
1369138_a_at	1.04799	0.879749	1.07228	0.79912	-1.04873	0.877779
1369139_at	-1.08765	0.707047	-1.12644	0.555621	1.00824	0.981967
1369140_at	-1.0685	0.76506	-1.04514	0.862177	1.08059	0.711278
1369141_at	1.08072	0.674396	1.06844	0.732632	1.10225	0.570289
1369142_at	1.04762	0.872425	1.05568	0.844158	1.06232	0.820812
1369143_at	1.05548	0.791743	1.0326	0.893185	1.08059	0.666784
1369144_a_at	1.14187	0.660381	1.1448	0.653027	1.20484	0.496494
1369145_a_at	1.16412	0.454317	1.23933	0.256421	1.14008	0.532973
1369146_a_at	-1.03193	0.961349	1.69267	0.113169	1.58391	0.17744
1369147_at	1.03776	0.90375	1.22414	0.287632	1.0134	0.970417
1369148_at	-1.05087	0.854849	-1.05592	0.836533	-1.07006	0.7828
1369149_at	1.19781	0.25339	1.06754	0.75207	-1.02151	0.93852
1369150_at	1.00845	0.980682	1.22405	0.23737	1.44245	0.0152528
1369151_at	1.4656	0.569236	1.0693	0.949264	1.11339	0.912065
1369152_at	-1.12001	0.832476	-1.12113	0.831206	-1.22497	0.646158
1369153_at	1.16832	0.387432	-1.0037	0.992536	1.07253	0.756472
1369154_at	1.08225	0.675345	1.0418	0.861971	1.1083	0.555734
1369155_at	1.07791	0.660274	1.05938	0.757179	1.0729	0.684923
1369156_at	-1.13369	0.712379	-1.13372	0.712376	-1.14403	0.684413
1369157_at	-1.13286	0.698551	1.06058	0.885795	1.14135	0.675345
1369158_at	1.03498	0.926123	-1.08677	0.778684	-1.04752	0.894732
1369159_at	-1.0419	0.829558	1.00941	0.970682	-1.03401	0.869712
1369160_a_at	-1.10093	0.71448	-1.1001	0.717511	1.04867	0.884667
1369161_at	-1.00288	0.993303	1.02322	0.926993	1.01559	0.953298
1369162_at	-1.44303	0.458538	-1.31953	0.601885	-1.41585	0.485967
1369163_at	1.10909	0.619174	1.10805	0.623588	1.07391	0.762037
1369164_a_at	-1.11336	0.52196	-1.02298	0.930155	-1.02993	0.904619
1369165_at	-1.00079	0.998267	1.03834	0.851299	1.02615	0.90656
1369166_at	1.06025	0.900734	-1.0594	0.902971	1.02318	0.96598
1369167_at	1.05311	0.90666	-1.19453	0.562334	-1.03364	0.944428
1369168_a_at	1.11243	0.580476	1.05847	0.810439	-1.00653	0.985898
1369169_at	1.10869	0.72078	1.22782	0.389184	1.4248	0.09913
1369170_at	-1.04938	0.875669	-1.03055	0.928795	-1.05016	0.872606
1369171_at	1.00137	0.997901	-1.03354	0.911209	-1.13858	0.512694
1369172_at	1.02498	0.913662	1.02293	0.92148	1.11775	0.451709
1369173_at	-1.07242	0.75845	-1.25687	0.170053	-1.22201	0.243218
1369174_at	-1.12068	0.745849	-1.17277	0.613015	-1.00717	0.990606
1369175_a_at	1.10175	0.624079	1.13137	0.505399	1.10157	0.623926
1369176_at	-1.05111	0.857739	1.02041	0.951353	-1.02557	0.937168
1369177_at	-1.00296	0.996662	-1.12801	0.724618	1.03189	0.947385
1369178_a_at	-1.11752	0.782051	-1.12527	0.763557	-1.30841	0.384827
1369179_a_at	1.06222	0.8543	1.11546	0.684997	-1.0209	0.95822
1369180_at	1.11046	0.546944	1.03186	0.900472	-1.01359	0.961982
1369181_at	-1.06324	0.905973	-1.1445	0.742055	-1.64045	0.0972089
1369182_at	1.2014	0.645289	1.02933	0.962412	-1.0253	0.968349
1369183_at	1.13636	0.436776	1.16227	0.344308	1.11534	0.522691
1369184_at	1.13701	0.39784	1.08002	0.658519	1.02689	0.910294
1369185_a_at	-1.00884	0.980363	-1.00779	0.983305	-1.05933	0.82143
1369186_at	-1.07165	0.879226	-1.17602	0.638172	-1.41021	0.232736
1369187_a_at	1.08332	0.585722	1.18493	0.169653	1.07923	0.606411
1369188_at	-1.07965	0.706459	1.0497	0.838109	1.16191	0.376021
1369189_at	1.06056	0.794911	1.13973	0.459039	1.03849	0.883167
1369190_at	1.02718	0.933914	1.00799	0.983672	1.01052	0.977002
1369191_at	1.05166	0.836533	1.11133	0.582924	1.0475	0.852931
1369192_at	1.04339	0.939073	1.08657	0.864194	1.01015	0.98833
1369193_at	1.11086	0.493696	1.1441	0.353361	1.02306	0.9226
1369194_a_at	1.10255	0.566532	1.02775	0.911813	-1.00234	0.995144
1369195_at	1.11634	0.819141	1.34077	0.412367	1.23537	0.583355
1369196_at	1.12258	0.557772	1.22651	0.237947	1.1339	0.511934
1369197_at	1.08386	0.679739	-1.04181	0.866794	1.00982	0.974753
1369198_at	1.08368	0.782369	1.21527	0.385072	1.01057	0.980363
1369199_at	-1.01905	0.952895	1.04137	0.884634	-1.01066	0.97546
1369200_at	-1.05596	0.88031	-1.19127	0.485897	-1.1804	0.514443
1369201_at	1.11752	0.501646	1.09417	0.606172	1.09354	0.608063
1369202_at	-1.03488	0.970529	-1.00232	0.998681	-1.11783	0.882983
1369203_at	-1.09613	0.823935	-1.09077	0.83543	1.04905	0.920446
1369204_at	-1.13093	0.759831	-1.25381	0.499188	-1.50547	0.165628
1369205_at	1.11061	0.633112	1.22078	0.292132	1.10078	0.669523
1369206_at	-1.03177	0.856807	-1.07896	0.561398	-1.11199	0.376045
1369207_at	1.07038	0.794779	1.13693	0.548169	-1.01419	0.968762
1369208_at	1.03229	0.928773	-1.0617	0.845807	-1.10525	0.697818
1369209_at	1.02787	0.931774	-1.09584	0.689225	1.02021	0.952184
1369210_at	-1.01706	0.942843	1.00254	0.993508	-1.03419	0.87183
1369211_at	1.12252	0.565855	1.12238	0.566255	1.09498	0.67425
1369212_s_at	-1.0476	0.869189	-1.01304	0.970682	-1.025	0.938414
1369213_at	1.00477	0.992606	1.06224	0.858187	1.02654	0.947376
1369214_a_at	1.07091	0.768982	1.11498	0.587581	-1.00427	0.99133
1369215_a_at	-1.0319	0.971395	-1.18907	0.777083	1.19561	0.766224
1369216_a_at	1.06017	0.733138	1.0395	0.844756	-1.01614	0.945892
1369217_at	1.05495	0.761722	1.09996	0.519703	-1.02098	0.926941
1369218_at	-1.1289	0.753696	-1.07592	0.872651	-1.32941	0.348987
1369219_at	1.10978	0.591505	1.14281	0.462849	1.03392	0.903633
1369220_at	-1.05198	0.879656	-1.0453	0.89784	-1.1148	0.675536
1369221_at	1.06271	0.777083	1.01769	0.950949	-1.01351	0.963381
1369222_at	-1.00381	0.993318	1.05246	0.864391	1.02991	0.930342
1369223_at	1.03504	0.880219	1.15706	0.329998	1.08903	0.615282
1369224_at	1.30089	0.599393	1.13456	0.84328	1.15364	0.816109
1369225_at	1.03031	0.92476	1.06707	0.80419	1.0599	0.829155
1369226_at	-1.18372	0.6286	-1.26026	0.470725	-1.43778	0.212505
1369227_at	1.10507	0.816439	1.02233	0.969694	-1.12424	0.772347
1369228_at	1.05297	0.86612	1.1597	0.499743	1.0992	0.704312
1369229_at	-1.06336	0.70207	1.05385	0.757667	1.03259	0.872307
1369230_at	-1.08322	0.68831	-1.03538	0.893233	-1.01453	0.961122
1369231_at	-1.03321	0.901879	1.0794	0.707829	-1.01718	0.953509
1369232_at	-1.00072	0.99839	-1.09523	0.535957	-1.03771	0.849908
1369233_at	1.04218	0.863414	1.01425	0.96086	1.01396	0.961822
1369234_at	1.014	0.980138	1.06322	0.890685	-1.01565	0.977279
1369235_at	1.02754	0.885103	1.05758	0.707982	1.00736	0.974612
1369236_at	-1.13758	0.541154	-1.1963	0.358494	-1.33879	0.0994853
1369237_at	1.0084	0.962419	1.01301	0.939256	1.02111	0.892556
1369238_at	1.64314	0.400259	1.41413	0.591623	1.29777	0.711089
1369239_at	1.09049	0.563506	1.11695	0.433713	1.02986	0.887965
1369240_a_at	1.06659	0.787906	1.12482	0.552396	1.03533	0.903633
1369241_at	1.07986	0.648785	1.10841	0.506819	1.06967	0.700239
1369242_at	-1.00223	0.99613	-1.05187	0.851588	1.0455	0.874279
1369243_at	-1.06141	0.759462	1.0163	0.951353	1.00926	0.974284
1369244_at	-1.00326	0.994739	1.05739	0.849856	1.001	0.998502
1369245_at	1.01774	0.953509	1.04327	0.870039	-1.00799	0.981039
1369246_a_at	1.12244	0.406203	1.09717	0.526533	1.05128	0.77769
1369247_at	-1.06348	0.85776	-1.09358	0.768339	-1.24496	0.351382
1369248_a_at	1.00576	0.994791	-1.34014	0.440337	-1.12606	0.811824
1369249_at	1.02334	0.964389	1.02291	0.965347	1.08484	0.843116
1369250_at	1.05148	0.89372	1.11733	0.705104	1.06035	0.87183
1369251_a_at	-1.02114	0.942843	1.05833	0.80848	1.01174	0.971031
1369252_a_at	1.05348	0.836194	-1.0296	0.919699	1.03867	0.890471
1369253_at	1.18586	0.185638	1.1942	0.167244	1.15177	0.295344
1369254_a_at	-1.09295	0.340205	-1.02372	0.864885	-1.07875	0.430917
1369255_at	-1.02989	0.935046	-1.00723	0.987281	-1.19059	0.432944
1369256_at	-1.08403	0.750608	1.05424	0.856368	-1.07868	0.76943
1369257_at	1.09466	0.55501	1.1542	0.298028	1.11328	0.461007
1369258_at	-1.00234	0.993628	1.021	0.921265	-1.05251	0.757437
1369259_at	1.11768	0.843062	-1.17651	0.742125	-1.25817	0.601885
1369260_a_at	1.04832	0.865846	1.01245	0.971999	1.01756	0.957631
1369261_at	1.10261	0.663179	1.01022	0.977617	1.03041	0.923239
1369262_at	1.01778	0.950661	1.04004	0.874524	-1.09163	0.643596
1369263_at	1.06104	0.731259	1.07237	0.669133	1.05046	0.789134
1369264_at	1.00255	0.996025	1.10607	0.685809	1.1401	0.567205
1369265_at	1.00119	0.99839	-1.01078	0.980725	1.01504	0.971999
1369266_at	1.08074	0.914468	1.15337	0.819141	-1.00704	0.994866
1369267_at	1.05449	0.7714	1.1068	0.497886	1.03418	0.874169
1369268_at	1.25331	0.465926	1.07229	0.876129	1.47476	0.159758
1369269_at	-1.0523	0.879439	-1.04736	0.893083	-1.09831	0.73202
1369270_at	1.05835	0.785513	1.08801	0.643361	1.09458	0.61089
1369271_at	1.06202	0.690028	1.10228	0.45944	1.08123	0.573171
1369272_at	-1.27218	0.572268	-1.21984	0.660356	-1.27579	0.566255
1369273_a_at	-1.04433	0.87585	1.09026	0.694263	1.03853	0.894249
1369274_a_at	1.00278	0.995905	1.16794	0.496066	1.20229	0.398485
1369275_s_at	-1.10416	0.750547	1.12784	0.679739	1.34348	0.20858
1369276_at	-1.00769	0.98349	1.0618	0.810335	1.0063	0.986976
1369277_at	-1.03312	0.89961	1.13396	0.465927	1.14351	0.430743
1369278_at	-1.04234	0.899036	1.00226	0.996571	1.02825	0.936688
1369279_at	-1.05494	0.820663	1.08383	0.693121	-1.00837	0.979875
1369280_at	1.12534	0.477909	1.09751	0.600096	1.13172	0.451784
1369281_at	-1.0234	0.91585	-1.0125	0.958333	1.02353	0.915226
1369282_at	-1.00499	0.985194	1.01776	0.935043	1.0057	0.982134
1369283_at	-1.05163	0.801519	-1.03899	0.861401	-1.06603	0.727389
1369284_at	1.09282	0.706166	1.16032	0.464331	1.01935	0.95456
1369285_at	-1.01786	0.942874	-1.06801	0.711278	1.05036	0.802487
1369286_at	1.01357	0.963593	1.00209	0.995905	-1.04049	0.872958
1369287_at	1.00161	0.995544	1.04479	0.769362	-1.05512	0.698986
1369288_at	1.0455	0.873906	1.00502	0.990216	1.04638	0.870605
1369289_at	-1.08521	0.79835	-1.03854	0.92195	-1.04585	0.905449
1369290_at	-1.16216	0.616591	-1.08319	0.829155	-1.29216	0.331876
1369291_at	-1.00596	0.989804	-1.01881	0.960962	-1.20463	0.39061
1369292_at	1.04141	0.887016	1.02971	0.923134	-1.03496	0.907469
1369293_at	-1.19257	0.441216	-1.07733	0.802487	-1.1366	0.604092
1369294_at	-1.17019	0.450846	-1.2432	0.263771	-1.26369	0.222857
1369295_at	-1.02562	0.942243	-1.09152	0.729628	-1.17693	0.442305
1369296_at	-1.67674	0.296216	-1.28848	0.666655	1.24604	0.720524
1369297_at	-1.04627	0.804841	-1.07942	0.61746	1.03808	0.847337
1369298_at	-1.19082	0.428281	-1.0621	0.842714	-1.06024	0.848758
1369299_at	1.05365	0.692938	1.07498	0.548714	-1.01036	0.956777
1369300_at	-1.01079	0.968062	1.02017	0.935394	1.04228	0.842471
1369301_at	1.06415	0.845905	1.13352	0.619942	-1.0355	0.923239
1369302_at	1.00089	0.998502	1.015	0.96245	-1.00939	0.978
1369303_at	1.00547	0.988932	-1.01741	0.956396	1.00894	0.979911
1369304_at	1.04164	0.93595	1.11071	0.79377	1.07091	0.881076
1369305_at	-1.02015	0.979066	-1.14368	0.800627	-1.30317	0.534722
1369306_at	-1.05054	0.936732	-1.00681	0.993433	-1.13981	0.78799
1369307_at	-1.13424	0.413156	1.01961	0.93886	-1.07584	0.679554
1369308_at	1.11468	0.567634	1.14921	0.437601	1.0981	0.636539
1369309_a_at	-1.01209	0.973334	1.05398	0.851103	1.05106	0.860767
1369310_at	-1.14162	0.646575	-1.06219	0.872166	1.02321	0.957786
1369311_at	1.00226	0.992623	1.00085	0.997901	1.04515	0.750783
1369312_a_at	1.0111	0.973148	-1.10158	0.632114	-1.08877	0.684985
1369313_at	1.09099	0.743577	-1.03828	0.911292	-1.0314	0.930004
1369314_at	-1.00826	0.97546	-1.02429	0.916019	1.03295	0.88007
1369315_at	-1.00071	0.999168	1.03254	0.920188	-1.06234	0.825569
1369316_s_at	1.01737	0.971999	1.1204	0.724909	1.12315	0.716783
1369317_at	1.06054	0.723244	1.07228	0.658125	1.05285	0.766251
1369318_at	-1.03278	0.914061	-1.00887	0.98072	1.10618	0.637302
1369319_at	-1.1414	0.630894	-1.11627	0.706395	-1.1242	0.681484
1369320_at	1.01507	0.957656	1.05457	0.809184	1.04441	0.852341
1369321_s_at	1.0077	0.987281	1.02219	0.956169	-1.00359	0.994791
1369322_at	-1.0852	0.682186	-1.01467	0.961208	-1.12917	0.495534
1369323_at	1.08309	0.821886	-1.07081	0.853163	1.05357	0.8952
1369324_at	1.05294	0.756556	1.14382	0.29649	1.14105	0.305329
1369325_at	1.02781	0.945892	-1.0174	0.968219	-1.11834	0.692268
1369326_at	1.0228	0.928925	-1.0136	0.959867	1.01769	0.946653
1369327_at	1.03915	0.889201	1.05617	0.826972	1.02131	0.944977
1369328_at	1.0723	0.763439	1.04344	0.8764	1.00639	0.986827
1369329_at	1.15566	0.436294	1.21556	0.263258	1.05804	0.819657
1369330_at	1.05107	0.799152	1.21512	0.150869	1.09909	0.552189
1369331_a_at	1.05771	0.864702	-1.01324	0.975078	1.07007	0.827048
1369332_a_at	1.13403	0.473361	1.17041	0.347285	1.10555	0.589657
1369333_a_at	-1.005	0.981967	-1.04338	0.768529	-1.01052	0.956646
1369334_at	-1.0034	0.994223	1.06302	0.830039	-1.00537	0.990253
1369335_at	-1.00571	0.984982	-1.03119	0.891398	-1.0086	0.975089
1369336_at	1.17014	0.513799	1.1107	0.698136	1.18821	0.462316
1369337_at	-1.35777	0.422328	1.37966	0.390314	1.38628	0.381877
1369338_at	1.15497	0.394989	1.13458	0.468834	1.02596	0.924655
1369339_at	1.0385	0.851299	1.01226	0.960629	-1.04721	0.806202
1369340_at	1.00148	0.997901	1.07416	0.7867	1.07536	0.781836
1369341_a_at	1.00665	0.982037	1.05125	0.8045	1.06088	0.755119
1369342_at	-1.02971	0.971893	-1.29834	0.598244	-1.07242	0.922169
1369343_at	1.0201	0.936272	1.05896	0.76266	-1.0787	0.659828
1369344_at	-1.06496	0.680817	-1.03017	0.879309	-1.10659	0.449094
1369345_at	-1.03788	0.863739	-1.02764	0.906599	-1.04406	0.833119
1369346_at	-1.01244	0.961347	1.12584	0.421996	1.12878	0.407721
1369347_s_at	1.04318	0.874163	1.20528	0.283666	1.19506	0.307418
1369348_at	-1.04387	0.83305	-1.0181	0.94228	1.00179	0.996025
1369349_a_at	1.02016	0.900641	1.02674	0.859714	1.03584	0.794977
1369350_at	-1.01584	0.963655	1.09894	0.681278	1.0384	0.901631
1369351_at	1.00862	0.977216	1.02258	0.933024	1.05541	0.799734
1369352_at	-1.09751	0.599525	-1.11424	0.526358	-1.16272	0.340205
1369353_at	1.10496	0.612915	1.06528	0.78372	1.01846	0.952123
1369354_at	1.08024	0.396527	1.14821	0.0874737	1.07951	0.400196
1369355_at	-1.00373	0.992466	1.07985	0.723178	-1.02065	0.945859
1369356_at	1.00417	0.987281	-1.03177	0.864391	-1.00463	0.985978
1369357_at	-1.05009	0.839534	-1.01148	0.971395	-1.1215	0.532276
1369358_a_at	-1.04605	0.785846	1.03541	0.846884	-1.08533	0.549303
1369359_at	1.09224	0.727858	1.13168	0.588598	1.05548	0.85635
1369360_at	1.03745	0.821671	1.08527	0.515725	-1.00311	0.990253
1369361_at	1.02331	0.939615	1.04624	0.865062	1.02794	0.925121
1369362_at	1.06657	0.849856	1.19814	0.462997	1.11869	0.689959
1369363_at	-1.01552	0.957419	1.01576	0.956479	-1.16048	0.372699
1369364_at	-1.00542	0.987703	1.01085	0.972213	-1.04534	0.853742
1369365_at	1.00104	0.99839	1.06176	0.826028	1.06195	0.824706
1369366_at	1.13184	0.475458	1.11931	0.528024	1.12763	0.49161
1369367_at	-1.02805	0.923134	1.01285	0.968525	1.03355	0.905973
1369368_at	1.15336	0.428796	1.06827	0.769362	1.09242	0.66353
1369369_at	-1.07141	0.78263	1.0849	0.728446	1.01168	0.973778
1369370_s_at	-1.01651	0.963881	1.04369	0.891398	1.02136	0.952184
1369371_a_at	1.0254	0.939593	1.12137	0.60137	1.03308	0.917616
1369372_at	1.00245	0.993849	1.14199	0.345119	1.00495	0.986895
1369373_at	-1.04377	0.873894	-1.10142	0.637966	-1.31414	0.0938409
1369374_at	1.05885	0.777097	1.0823	0.661419	1.11872	0.492036
1369375_a_at	1.08615	0.790209	1.03709	0.923786	-1.03854	0.920213
1369376_a_at	1.01688	0.964595	1.10941	0.675835	1.08852	0.748702
1369377_at	1.06812	0.730917	1.22708	0.157993	1.02167	0.933991
1369378_at	1.07528	0.71372	1.00437	0.990252	1.1113	0.550117
1369379_at	-1.02988	0.923134	1.05005	0.858954	-1.06822	0.791087
1369380_at	-1.07683	0.836211	-1.14991	0.630437	-1.09839	0.777083
1369381_a_at	1.09	0.746803	1.09587	0.726492	1.10459	0.694958
1369382_at	-1.0771	0.895311	1.02581	0.969944	-1.11771	0.825146
1369383_a_at	1.1104	0.460868	-1.02069	0.927376	1.02806	0.895954
1369384_at	-1.01746	0.937207	1.05711	0.73081	1.00328	0.990857
1369385_at	1.04615	0.80848	1.02553	0.907534	-1.01501	0.949453
1369386_at	1.01915	0.956396	1.06761	0.811371	-1.00469	0.99141
1369387_at	-1.04172	0.925264	-1.04187	0.92499	-1.21966	0.476934
1369388_at	1.04709	0.858954	1.15748	0.423203	1.03526	0.900565
1369389_at	1.01538	0.966238	1.03687	0.909049	1.04494	0.885293
1369390_a_at	-1.01152	0.974592	1.03655	0.905973	-1.07296	0.778153
1369391_at	1.00783	0.98072	1.00648	0.984932	1.14722	0.418857
1369392_at	-1.02423	0.936317	-1.01609	0.959132	-1.04362	0.873039
1369393_at	-1.20511	0.580972	-1.38181	0.279653	-1.49139	0.160725
1369394_at	1.04882	0.865062	1.05211	0.853545	-1.07656	0.760955
1369395_at	1.00756	0.983898	-1.04499	0.874115	1.02056	0.948726
1369396_at	1.04218	0.806577	-1.04334	0.79975	1.00015	0.999416
1369397_at	1.08168	0.744976	1.06819	0.797985	-1.00726	0.98582
1369398_at	1.15406	0.259885	1.14124	0.3073	-1.10807	0.450423
1369399_at	1.10996	0.857846	-1.07215	0.912798	-1.07463	0.909119
1369400_a_at	1.08088	0.602027	1.05445	0.754	1.08621	0.57118
1369401_at	1.0028	0.991973	1.0483	0.769881	-1.00842	0.971158
1369402_at	1.0349	0.908451	1.04755	0.868609	-1.02588	0.935495
1369403_at	1.07923	0.704783	1.15512	0.394565	1.06154	0.785283
1369404_a_at	1.02679	0.909535	1.02661	0.909984	1.01082	0.967881
1369405_a_at	1.05472	0.804699	1.08111	0.679069	1.01229	0.96598
1369406_at	1.02245	0.952832	1.22408	0.347285	1.04613	0.891811
1369407_at	1.0259	0.947714	1.01887	0.962762	1.00403	0.993671
1369408_at	1.08544	0.78294	1.11176	0.696499	1.12777	0.644891
1369409_at	-1.07553	0.8801	-1.16534	0.6861	1.00286	0.997353
1369410_at	1.09195	0.824636	1.06171	0.892444	1.03827	0.937796
1369411_at	-1.0454	0.908388	-1.05479	0.886113	-1.14661	0.618887
1369412_a_at	1.0321	0.898629	-1.01332	0.962419	-1.00282	0.993671
1369413_at	1.06825	0.67147	1.07576	0.627735	1.11006	0.445835
1369414_at	1.0226	0.93952	1.07655	0.732695	1.07673	0.731519
1369415_at	1.24449	0.779099	1.07752	0.941138	1.53291	0.498461
1369416_at	-1.02587	0.928262	1.03161	0.908819	-1.02599	0.927746
1369417_a_at	1.02155	0.950553	1.058	0.84241	1.07478	0.782369
1369418_at	-1.02338	0.9198	1.04351	0.830379	1.03148	0.886155
1369419_at	1.04838	0.798542	1.06952	0.68067	1.04545	0.813037
1369420_at	1.02836	0.927376	1.09872	0.665135	1.10777	0.627392
1369421_at	-1.06811	0.896641	-1.14313	0.743133	-1.24148	0.538279
1369422_at	1.13516	0.720974	1.08353	0.846404	1.09801	0.812023
1369423_at	1.00385	0.99452	-1.0653	0.853438	1.02927	0.942645
1369424_at	1.26646	0.723169	-1.0627	0.948203	1.03634	0.971893
1369425_at	1.13422	0.793785	1.11566	0.828427	1.00055	0.999416
1369426_at	-1.03352	0.928204	1.02029	0.958541	1.06649	0.835754
1369427_at	1.03677	0.903576	-1.06558	0.801769	-1.01228	0.972193
1369428_a_at	1.01127	0.949237	1.02833	0.849856	1.07966	0.472996
1369429_at	-1.08197	0.687554	-1.04974	0.832514	1.00094	0.998267
1369430_at	1.0491	0.907804	-1.01534	0.97542	1.13551	0.68067
1369431_at	1.07829	0.707105	1.18136	0.308034	1.008	0.980133
1369432_at	-1.02413	0.921769	1.13514	0.410387	-1.03616	0.875414
1369433_at	-1.03562	0.932674	-1.02567	0.953172	-1.01244	0.979206
1369434_at	-1.02431	0.91701	-1.04772	0.811794	1.01133	0.964898
1369435_at	-1.14588	0.623662	-1.00425	0.993849	1.00588	0.991181
1369436_at	1.16764	0.346177	1.21599	0.21182	1.01345	0.963501
1369437_at	1.07026	0.865858	1.12496	0.724839	1.02701	0.954911
1369438_at	1.13553	0.418713	1.17354	0.286449	1.04864	0.822037
1369439_at	-1.00892	0.980177	1.06145	0.813721	1.00465	0.990887
1369440_at	1.15437	0.691062	-1.02486	0.963615	1.09784	0.823382
1369441_at	-1.04548	0.869319	1.03389	0.907534	1.03773	0.895145
1369442_at	1.02036	0.933991	1.02431	0.918337	1.07587	0.666643
1369443_at	1.15052	0.54546	1.11703	0.655571	1.03454	0.921126
1369444_at	1.06628	0.69677	1.04715	0.804093	1.0943	0.545477
1369445_at	1.09334	0.722583	1.23144	0.301268	1.14863	0.528594
1369446_at	1.15051	0.562922	1.15787	0.539807	1.13131	0.620158
1369447_at	-1.03637	0.897505	1.00649	0.986331	-1.10413	0.621883
1369448_at	1.12456	0.546294	1.15149	0.446971	1.09222	0.675345
1369449_at	1.05987	0.823682	1.0757	0.762037	1.05619	0.835754
1369450_at	1.12415	0.804841	1.23623	0.585549	1.35061	0.39784
[truncated: 29,100 more rows]
